# Supplementary material for: Benchmark Study on Phosphorescence Energies of Anthraquinone Compounds: Comparison between TDDFT and UDFT
Source: MDPI journal article supplement (doi:10.3390/molecules28073257), 2023-04-05
Supplement: s1 [file s1]

# Benchmark Study on Phosphorescence Energies with TDDFT and UDFT against

## Anthraquinone Compounds

Yujie Guo, Lingyu Zhang, Zexing Qu\*

Institute of Theoretical Chemistry, College of Chemistry, Jilin University, Changchun,

130023, China

\* Corresponding author e-mail:

zxqu@jlu.edu.cn

Contents:

Cartesian Coordinates

**Table S1.** Cartesian coordinates (Å) of optimized geometries.

HA Singlet

|   |             |             |            |
|---|-------------|-------------|------------|
| C | -0.86001100 | -3.85868000 | 0.00000000 |
| C | 0.28996900  | -3.09101700 | 0.00000000 |
| C | 0.20016100  | -1.67645400 | 0.00000000 |
| C | -1.07841500 | -1.05679600 | 0.00000000 |
| C | -2.22799100 | -1.86321200 | 0.00000000 |
| C | -2.12745300 | -3.24591500 | 0.00000000 |
| C | 1.37196600  | -0.84561200 | 0.00000000 |
| C | -1.21957500 | 0.40438900  | 0.00000000 |
| C | 0.00000000  | 1.19620900  | 0.00000000 |
| C | 1.29115100  | 0.58812400  | 0.00000000 |
| C | 2.45597800  | 1.38425400  | 0.00000000 |
| H | 3.43495000  | 0.91806100  | 0.00000000 |
| C | 2.33675700  | 2.76884900  | 0.00000000 |
| C | 1.08788000  | 3.39031700  | 0.00000000 |
| C | -0.08263300 | 2.61877500  | 0.00000000 |
| H | -0.78138900 | -4.94213500 | 0.00000000 |
| H | 1.26410300  | -3.56903400 | 0.00000000 |
| H | -3.19052500 | -1.36251900 | 0.00000000 |
| H | -3.02517000 | -3.85703600 | 0.00000000 |
| H | 3.23462600  | 3.38062200  | 0.00000000 |
| H | 0.99046900  | 4.47072800  | 0.00000000 |
| O | -2.35970700 | 0.93826500  | 0.00000000 |
| O | 2.54743200  | -1.41665000 | 0.00000000 |
| O | -1.26155700 | 3.24727600  | 0.00000000 |
| H | -1.96312000 | 2.53080700  | 0.00000000 |

## HA Triplet

|   |             |             |            |
|---|-------------|-------------|------------|
| C | -0.86097600 | -3.85842300 | 0.00000000 |
| C | 0.28864500  | -3.09084400 | 0.00000000 |
| C | 0.19683700  | -1.67681900 | 0.00000000 |
| C | -1.08021800 | -1.05651300 | 0.00000000 |
| C | -2.23058700 | -1.86322300 | 0.00000000 |
| C | -2.12934400 | -3.24575400 | 0.00000000 |
| C | 1.37357700  | -0.84749600 | 0.00000000 |
| C | -1.22002100 | 0.40498000  | 0.00000000 |
| C | 0.00000000  | 1.19691300  | 0.00000000 |
| C | 1.29014600  | 0.58956000  | 0.00000000 |
| C | 2.45647200  | 1.38277000  | 0.00000000 |
| H | 3.43189400  | 0.90747200  | 0.00000000 |
| C | 2.33833500  | 2.76719500  | 0.00000000 |
| C | 1.08976100  | 3.39052300  | 0.00000000 |
| C | -0.08195000 | 2.61973600  | 0.00000000 |
| H | -0.78264200 | -4.94198200 | 0.00000000 |
| H | 1.26711400  | -3.56152400 | 0.00000000 |
| H | -3.19320200 | -1.36238500 | 0.00000000 |
| H | -3.02681800 | -3.85719900 | 0.00000000 |
| H | 3.23655000  | 3.37866100  | 0.00000000 |
| H | 0.99348700  | 4.47100700  | 0.00000000 |
| O | -2.35970500 | 0.93975700  | 0.00000000 |
| O | 2.55171000  | -1.41887800 | 0.00000000 |
| O | -1.26041000 | 3.24869700  | 0.00000000 |
| H | -1.96321600 | 2.53370800  | 0.00000000 |

## AAT Singlet

|   |             |             |             |
|---|-------------|-------------|-------------|
| C | -3.94100800 | 0.38496800  | 0.00007900  |
| C | -2.84435400 | 1.22728600  | 0.00013900  |
| C | -1.53470500 | 0.70315400  | 0.00001500  |
| C | -1.35396400 | -0.70842900 | -0.00017800 |
| C | -2.48794400 | -1.55071400 | -0.00021400 |
| C | -3.76208700 | -1.01477800 | -0.00010500 |
| C | -0.39675800 | 1.61982100  | 0.00011600  |
| C | -0.02533000 | -1.30513500 | -0.00025300 |
| C | 1.11002800  | -0.37751900 | -0.00010000 |
| C | 0.92677800  | 1.01545500  | 0.00009600  |
| C | 2.07554500  | 1.89619000  | 0.00008600  |
| H | 1.86465200  | 2.95995900  | 0.00039500  |
| C | 3.37017400  | 1.40649000  | -0.00033600 |
| C | 3.58674200  | 0.02587500  | -0.00055800 |
| C | 2.47313300  | -0.86897400 | 0.00005900  |
| H | -4.94526400 | 0.80091400  | 0.00019800  |
| H | -2.95497500 | 2.30670900  | 0.00029200  |
| H | -2.32550000 | -2.62335000 | -0.00035200 |
| H | -4.62817300 | -1.67130400 | -0.00018500 |
| H | 4.21637000  | 2.08632200  | -0.00067600 |
| H | 4.59089300  | -0.38952100 | -0.00080100 |

|   |             |             |             |
|---|-------------|-------------|-------------|
| O | 0.13935900  | -2.56390500 | -0.00024500 |
| O | -0.52444900 | 2.87259100  | 0.00022200  |
| H | 3.60343500  | -2.58223400 | 0.00031200  |
| N | 2.67050400  | -2.18907000 | 0.00103800  |
| H | 1.78824600  | -2.75564600 | 0.00068000  |

#### AAT Triplet

|   |             |             |             |
|---|-------------|-------------|-------------|
| C | -3.94032500 | 0.37757700  | -0.00002700 |
| C | -2.84490200 | 1.22312400  | 0.00013900  |
| C | -1.53594500 | 0.70148700  | 0.00010000  |
| C | -1.35050300 | -0.70785300 | -0.00017600 |
| C | -2.48041800 | -1.55338500 | -0.00035700 |
| C | -3.75683700 | -1.02012900 | -0.00026700 |
| C | -0.39685200 | 1.62576300  | 0.00021300  |
| C | -0.01615300 | -1.30206800 | -0.00018200 |
| C | 1.10893800  | -0.37714700 | -0.00052900 |
| C | 0.92399300  | 1.02276000  | 0.00007600  |
| C | 2.06762100  | 1.89445500  | -0.00010700 |
| H | 1.85915400  | 2.95951200  | 0.00004500  |
| C | 3.36989700  | 1.40551900  | -0.00050000 |
| C | 3.59007300  | 0.02857700  | -0.00065300 |
| C | 2.47749200  | -0.86785100 | 0.00005700  |
| H | -4.94577200 | 0.79064700  | 0.00004000  |
| H | -2.95713400 | 2.30239300  | 0.00026400  |
| H | -2.31477500 | -2.62550400 | -0.00056300 |
| H | -4.62088100 | -1.67950300 | -0.00042900 |
| H | 4.21238100  | 2.08975400  | -0.00108600 |
| H | 4.59486400  | -0.38510000 | -0.00066100 |
| O | 0.14432000  | -2.56401000 | 0.00002000  |
| O | -0.53788700 | 2.87410200  | 0.00068900  |
| H | 3.59624500  | -2.58618300 | 0.00065600  |
| N | 2.66528500  | -2.18658800 | 0.00117600  |
| H | 1.77099200  | -2.74562000 | 0.00112800  |

#### BP Singlet

|   |             |             |             |
|---|-------------|-------------|-------------|
| C | -0.00013700 | 0.92858800  | -0.00016400 |
| O | 0.00061000  | 2.26099500  | -0.00069600 |
| C | 1.29973200  | 0.30823900  | -0.01912300 |
| C | 1.50815500  | -0.99094800 | -0.55850300 |
| C | 2.43738600  | 1.03032900  | 0.44324600  |
| C | 2.77532800  | -1.55242100 | -0.57405600 |
| H | 0.66920200  | -1.53559300 | -0.97868200 |
| C | 3.70115700  | 0.45790600  | 0.40633900  |
| H | 2.29709800  | 2.02397300  | 0.85391400  |
| C | 3.88381900  | -0.83728700 | -0.09275600 |
| H | 2.91110800  | -2.55095500 | -0.98142400 |
| H | 4.55306600  | 1.02029400  | 0.77959700  |
| H | 4.87407000  | -1.28265900 | -0.11580700 |

|   |             |             |             |
|---|-------------|-------------|-------------|
| C | -1.29982000 | 0.30826600  | 0.01899500  |
| C | -1.50806500 | -0.99115000 | 0.55786300  |
| C | -2.43765500 | 1.03052700  | -0.44259200 |
| C | -2.77528100 | -1.55258300 | 0.57372500  |
| H | -0.66902300 | -1.53604000 | 0.97754100  |
| C | -3.70141200 | 0.45813000  | -0.40544200 |
| H | -2.29757000 | 2.02436800  | -0.85289300 |
| C | -3.88392800 | -0.83728800 | 0.09317500  |
| H | -2.91086500 | -2.55127500 | 0.98077700  |
| H | -4.55344500 | 1.02070700  | -0.77814000 |
| H | -4.87418900 | -1.28262400 | 0.11643200  |

#### BP Triplet

|   |             |             |             |
|---|-------------|-------------|-------------|
| C | 0.00004300  | 0.92006600  | -0.00003100 |
| O | -0.00017500 | 2.24963500  | -0.00027700 |
| C | 1.30687000  | 0.30017400  | 0.01699500  |
| C | 1.51906600  | -0.99439800 | 0.55624700  |
| C | 2.43535600  | 1.02802000  | -0.44776800 |
| C | 2.79108100  | -1.54840500 | 0.57313700  |
| H | 0.68211200  | -1.54525800 | 0.97231500  |
| C | 3.70471700  | 0.46542500  | -0.40706900 |
| H | 2.28694600  | 2.01944600  | -0.86257000 |
| C | 3.89431400  | -0.82646000 | 0.09426100  |
| H | 2.93214900  | -2.54698100 | 0.97867300  |
| H | 4.55328200  | 1.03352100  | -0.77927000 |
| H | 4.88740500  | -1.26561900 | 0.11896400  |
| C | -1.30684100 | 0.30016900  | -0.01701700 |
| C | -1.51910000 | -0.99431900 | -0.55646100 |
| C | -2.43526500 | 1.02793800  | 0.44801900  |
| C | -2.79110700 | -1.54832600 | -0.57326700 |
| H | -0.68218200 | -1.54510100 | -0.97270300 |
| C | -3.70463800 | 0.46534800  | 0.40738300  |
| H | -2.28679900 | 2.01928300  | 0.86298400  |
| C | -3.89428800 | -0.82644600 | -0.09413600 |
| H | -2.93223600 | -2.54684400 | -0.97892700 |
| H | -4.55315400 | 1.03338000  | 0.77978900  |
| H | -4.88737600 | -1.26561300 | -0.11878700 |

#### TX-BT Singlet

|   |             |             |             |
|---|-------------|-------------|-------------|
| C | 4.67363100  | -0.41860900 | -0.96332200 |
| C | 3.64066100  | -1.21797000 | -0.47502700 |
| C | 2.53152300  | -0.62330100 | 0.13498900  |
| C | 2.44106700  | 0.77166400  | 0.26223200  |
| C | 3.47194200  | 1.55638100  | -0.26324300 |
| C | 4.58637900  | 0.97109800  | -0.86526600 |
| C | 1.25725200  | 1.37616100  | 0.98667000  |
| C | -0.06609700 | 0.77279800  | 0.56485800  |
| C | -0.18683500 | -0.62360200 | 0.47311700  |

|   |             |             |             |
|---|-------------|-------------|-------------|
| C | -1.41525100 | -1.23463500 | 0.14138300  |
| H | -1.47381200 | -2.31364000 | 0.03605000  |
| C | -2.50868100 | -0.42945900 | -0.10299900 |
| C | -2.42834700 | 0.98851600  | -0.00466500 |
| C | -1.18744700 | 1.56667100  | 0.30644700  |
| H | 5.53569400  | -0.88211000 | -1.43499300 |
| H | 3.68660900  | -2.29855300 | -0.57651000 |
| H | 3.40505600  | 2.63904600  | -0.18293100 |
| H | 5.38204800  | 1.59822900  | -1.25750000 |
| H | 1.24065600  | 2.46194500  | 0.84751700  |
| H | -1.10437500 | 2.64861600  | 0.38103100  |
| S | 1.22707700  | -1.66685800 | 0.77604100  |
| C | -3.68249100 | 1.63060500  | -0.29101900 |
| S | -4.14622100 | -0.98913000 | -0.64694000 |
| C | -4.80878000 | 0.61987100  | -0.20005500 |
| H | -3.78080000 | 2.56931500  | -0.82731100 |
| H | -5.48471700 | 0.63693500  | 0.65691300  |
| H | 1.38880000  | 1.19889200  | 2.06752200  |

#### TX-BT Triplet

|   |             |             |             |
|---|-------------|-------------|-------------|
| C | 4.73740200  | -0.42359800 | -0.89988300 |
| C | 3.67704700  | -1.22005400 | -0.47190800 |
| C | 2.54545000  | -0.62403000 | 0.09631700  |
| C | 2.45988700  | 0.76880500  | 0.25092900  |
| C | 3.52511100  | 1.54913800  | -0.21015700 |
| C | 4.65843400  | 0.96494000  | -0.77624600 |
| C | 1.26664300  | 1.38625900  | 0.94827700  |
| C | -0.06332200 | 0.78354200  | 0.54341800  |
| C | -0.17717400 | -0.62276100 | 0.45480400  |
| C | -1.47022300 | -1.25992800 | 0.18671100  |
| H | -1.53238500 | -2.34269000 | 0.14710300  |
| C | -2.54493700 | -0.46354500 | -0.03859500 |
| C | -2.46571700 | 0.98616300  | 0.00015600  |
| C | -1.16974300 | 1.57842500  | 0.31415200  |
| H | 5.61444900  | -0.88680800 | -1.34307300 |
| H | 3.71762100  | -2.29922500 | -0.59114000 |
| H | 3.46735100  | 2.63044800  | -0.10857500 |
| H | 5.47618400  | 1.59195400  | -1.12015600 |
| H | 1.25445400  | 2.46794200  | 0.78059800  |
| H | -1.08921500 | 2.65963100  | 0.38352700  |
| S | 1.20786000  | -1.68226900 | 0.62462300  |
| C | -3.66568900 | 1.59465800  | -0.26589100 |
| S | -4.21310200 | -0.98509700 | -0.42787200 |
| C | -4.74847000 | 0.67464800  | -0.52743800 |
| H | -3.81342700 | 2.66971300  | -0.28128700 |
| H | -5.79182700 | 0.90945200  | -0.67734800 |
| H | 1.39246800  | 1.24146200  | 2.03446900  |

## TX-DBT Singlet

|   |             |             |             |
|---|-------------|-------------|-------------|
| C | 5.94363100  | -0.09077600 | 0.00040300  |
| C | 4.91117800  | -1.02303900 | 0.00004400  |
| C | 3.57993300  | -0.59645200 | -0.00006300 |
| C | 3.23364300  | 0.79560200  | 0.00007400  |
| C | 4.31802600  | 1.71721400  | 0.00053700  |
| C | 5.62933000  | 1.28435600  | 0.00068900  |
| C | 1.88218300  | 1.27211000  | -0.00028300 |
| C | 0.72181100  | 0.42036100  | -0.00032200 |
| C | 0.80414700  | -1.01913100 | -0.00017700 |
| C | -0.33347300 | -1.82582600 | 0.00002600  |
| H | -0.23576900 | -2.90780300 | 0.00013800  |
| C | -1.58649300 | -1.22007600 | 0.00000500  |
| H | 6.97716000  | -0.42164400 | 0.00051800  |
| H | 5.13419400  | -2.08708200 | -0.00017700 |
| H | 4.07344600  | 2.77238600  | 0.00073200  |
| H | 6.43204800  | 2.01713800  | 0.00105600  |
| S | 2.34964400  | -1.85806100 | -0.00055500 |
| C | -3.10558000 | 0.61428700  | -0.00012500 |
| C | -3.99319400 | -0.48533900 | 0.00020000  |
| C | -5.37584000 | -0.30687000 | 0.00043800  |
| C | -5.87767100 | 0.99451800  | 0.00028500  |
| C | -5.01245700 | 2.09856400  | -0.00009800 |
| C | -3.63387900 | 1.91415300  | -0.00030100 |
| H | -6.04855200 | -1.15939300 | 0.00076700  |
| H | -6.95268900 | 1.15126600  | 0.00049100  |
| H | -5.42202200 | 3.10438500  | -0.00025300 |
| H | -2.96548400 | 2.77052200  | -0.00060600 |
| C | -1.71201700 | 0.19967500  | -0.00021000 |
| S | -3.14586700 | -2.04243000 | 0.00032500  |
| C | -0.57084000 | 0.99296000  | -0.00040500 |
| H | -0.63520100 | 2.07435500  | -0.00057300 |
| O | 1.68097600  | 2.58449900  | -0.00034000 |

## TX-DBT Triplet

|   |             |             |             |
|---|-------------|-------------|-------------|
| C | 5.93949700  | -0.11342000 | -0.00034300 |
| C | 4.90060000  | -1.03659000 | -0.00014200 |
| C | 3.57093500  | -0.59320000 | -0.00000900 |
| C | 3.23117600  | 0.79820100  | -0.00007300 |
| C | 4.31989400  | 1.70643100  | -0.00022800 |
| C | 5.63109000  | 1.26256900  | -0.00038400 |
| C | 1.87836700  | 1.30531400  | 0.00010100  |
| C | 0.72347900  | 0.43180300  | 0.00021700  |
| C | 0.80331000  | -1.00824000 | 0.00014200  |
| C | -0.33371000 | -1.82507800 | 0.00000200  |
| H | -0.22912800 | -2.90644800 | 0.00005900  |
| C | -1.58610500 | -1.22429400 | -0.00007000 |
| H | 6.97096000  | -0.45027700 | -0.00052300 |
| H | 5.11226900  | -2.10305500 | 0.00000100  |

|   |             |             |             |
|---|-------------|-------------|-------------|
| H | 4.07758700  | 2.76254400  | -0.00022200 |
| H | 6.43859700  | 1.99037300  | -0.00052600 |
| S | 2.33867800  | -1.84228200 | 0.00052900  |
| C | -3.09933200 | 0.60972200  | 0.00008300  |
| C | -3.98983200 | -0.49046300 | -0.00017700 |
| C | -5.37176000 | -0.30725200 | -0.00030200 |
| C | -5.86916500 | 0.99578900  | -0.00012700 |
| C | -5.00172800 | 2.09979400  | 0.00015300  |
| C | -3.62501200 | 1.91283900  | 0.00025500  |
| H | -6.04757300 | -1.15723300 | -0.00051500 |
| H | -6.94381900 | 1.15516600  | -0.00020600 |
| H | -5.41031900 | 3.10589500  | 0.00028400  |
| H | -2.95330800 | 2.76636900  | 0.00045100  |
| C | -1.71010300 | 0.19709500  | 0.00009800  |
| S | -3.14760700 | -2.04771400 | -0.00028600 |
| C | -0.56729800 | 0.99676700  | 0.00023000  |
| H | -0.62847500 | 2.07878600  | 0.00031300  |
| O | 1.68628100  | 2.58638600  | 0.00005600  |

#### BDBT Singlet

|   |             |             |             |
|---|-------------|-------------|-------------|
| C | -4.64809200 | 2.14263800  | -0.45721900 |
| C | -5.58825600 | 1.10294400  | -0.39284900 |
| C | -5.18052500 | -0.21243300 | -0.18201300 |
| C | -3.81639300 | -0.46975600 | -0.03703100 |
| C | -2.85456200 | 0.56351800  | -0.09921600 |
| C | -3.28989000 | 1.87945500  | -0.31179600 |
| H | -4.98389600 | 3.16239300  | -0.62188300 |
| H | -6.64584000 | 1.32292300  | -0.50796300 |
| H | -5.90801000 | -1.01725200 | -0.13161400 |
| H | -2.56729000 | 2.68935100  | -0.36168200 |
| C | -1.47561700 | -1.34015700 | 0.27135000  |
| C | -0.26209200 | -2.02517900 | 0.47454800  |
| C | 0.92205300  | -1.31621000 | 0.47818700  |
| C | 0.94421700  | 0.09433700  | 0.24276500  |
| C | -0.29866100 | 0.77177300  | 0.07025800  |
| C | -1.49768800 | 0.06274900  | 0.07966500  |
| H | -0.25588300 | -3.09792000 | 0.64493500  |
| H | 1.85369200  | -1.83302700 | 0.67988800  |
| H | -0.28991400 | 1.84261900  | -0.09665600 |
| S | -3.07967200 | -2.05590500 | 0.23512200  |
| C | 2.16555500  | 0.85537300  | 0.27718200  |
| C | 3.51258200  | 0.41106800  | 0.01746300  |
| C | 4.61184600  | 1.13295900  | 0.55898500  |
| C | 3.79379700  | -0.69388600 | -0.82943100 |
| C | 5.91635300  | 0.73676400  | 0.29826800  |
| H | 4.41401600  | 1.98397400  | 1.20129100  |
| C | 5.10315300  | -1.08391300 | -1.07094400 |
| H | 2.97633800  | -1.22110200 | -1.31067600 |
| C | 6.17646300  | -0.37641600 | -0.50997900 |

|   |            |             |             |
|---|------------|-------------|-------------|
| H | 6.74110100 | 1.29403000  | 0.73505100  |
| H | 5.29523700 | -1.93652500 | -1.71726300 |
| H | 7.19885100 | -0.68399500 | -0.70927700 |
| O | 2.00511200 | 2.12190400  | 0.64559300  |

#### BDBT Triplet

|   |             |             |             |
|---|-------------|-------------|-------------|
| C | -4.63578900 | 2.15336400  | -0.46804300 |
| C | -5.58181700 | 1.11889900  | -0.40223700 |
| C | -5.18165300 | -0.19783900 | -0.18776300 |
| C | -3.81865400 | -0.46196000 | -0.04062600 |
| C | -2.85119100 | 0.56601400  | -0.10408200 |
| C | -3.27913100 | 1.88360500  | -0.32027400 |
| H | -4.96600300 | 3.17444500  | -0.63569500 |
| H | -6.63799700 | 1.34453800  | -0.51905400 |
| H | -5.91336800 | -0.99870400 | -0.13600900 |
| H | -2.55234400 | 2.68965700  | -0.37115900 |
| C | -1.48274600 | -1.34331900 | 0.27397300  |
| C | -0.27520000 | -2.03467500 | 0.47840800  |
| C | 0.91357400  | -1.33128500 | 0.48414300  |
| C | 0.94048500  | 0.07514500  | 0.24652100  |
| C | -0.29297200 | 0.75867500  | 0.06760500  |
| C | -1.49763000 | 0.05771600  | 0.07816700  |
| H | -0.27469900 | -3.10794000 | 0.64580000  |
| H | 1.84312000  | -1.85253500 | 0.68413800  |
| H | -0.27621800 | 1.82887100  | -0.10518700 |
| S | -3.09081600 | -2.05042100 | 0.23507200  |
| C | 2.16776000  | 0.83860900  | 0.29357500  |
| C | 3.51890600  | 0.40352600  | 0.02084500  |
| C | 4.61153200  | 1.13322300  | 0.55815300  |
| C | 3.80170100  | -0.69490900 | -0.82927700 |
| C | 5.91912200  | 0.75395600  | 0.28348600  |
| H | 4.40838900  | 1.97865900  | 1.20724500  |
| C | 5.11422400  | -1.07028700 | -1.08338200 |
| H | 2.98562000  | -1.23176700 | -1.30231700 |
| C | 6.18367500  | -0.35258700 | -0.53092900 |
| H | 6.74134700  | 1.31951300  | 0.71444700  |
| H | 5.30952300  | -1.92041500 | -1.73211100 |
| H | 7.20765100  | -0.64848000 | -0.74007800 |
| O | 1.99160800  | 2.08695700  | 0.70240700  |

#### FBDBT Singlet

|   |             |             |             |
|---|-------------|-------------|-------------|
| C | -5.06055300 | 2.07493400  | -0.52963900 |
| C | -5.98068700 | 1.01747400  | -0.46576100 |
| C | -5.55021600 | -0.28663300 | -0.23125800 |
| C | -4.18361100 | -0.51432600 | -0.06211000 |
| C | -3.24175200 | 0.53715200  | -0.12322500 |
| C | -3.69973100 | 1.84115100  | -0.36000500 |
| H | -5.41411400 | 3.08543600  | -0.71305800 |



|   |             |             |             |
|---|-------------|-------------|-------------|
| H | -7.04050900 | 1.21471700  | -0.59981000 |
| H | -6.26220400 | -1.10519200 | -0.18108800 |
| H | -2.99275600 | 2.66471700  | -0.40970900 |
| C | -1.83152500 | -1.33363700 | 0.29408900  |
| C | -0.60746700 | -1.99153300 | 0.52629900  |
| C | 0.56199700  | -1.25941900 | 0.53847800  |
| C | 0.56078500  | 0.14886800  | 0.28360000  |
| C | -0.69394700 | 0.79914500  | 0.08282000  |
| C | -1.87805100 | 0.06624600  | 0.08326200  |
| H | -0.58300900 | -3.06136100 | 0.71267000  |
| H | 1.49955700  | -1.75538200 | 0.76423600  |
| H | -0.70344700 | 1.86766700  | -0.09782500 |
| S | -3.41967100 | -2.08173100 | 0.24249300  |
| C | 1.76391700  | 0.93456600  | 0.32388400  |
| C | 3.12489000  | 0.51047500  | 0.10003800  |
| C | 4.19901200  | 1.26162700  | 0.65258800  |
| C | 3.44633700  | -0.59988700 | -0.72570800 |
| C | 5.51832600  | 0.89537600  | 0.42962000  |
| H | 3.97249100  | 2.11927500  | 1.27561200  |
| C | 4.76468800  | -0.97461400 | -0.93835600 |
| H | 2.65134100  | -1.15098300 | -1.21684300 |
| C | 5.78706700  | -0.22363800 | -0.35634300 |
| H | 6.34174400  | 1.45470300  | 0.86199200  |
| H | 5.01714700  | -1.82446300 | -1.56430500 |
| O | 1.57676300  | 2.20662300  | 0.66170800  |
| F | 7.06861300  | -0.58604200 | -0.57100800 |

#### FBDBT Triplet

|   |             |             |             |
|---|-------------|-------------|-------------|
| C | -5.04757000 | 2.08787900  | -0.54116100 |
| C | -5.97440500 | 1.03617700  | -0.47621500 |
| C | -5.55243000 | -0.26964400 | -0.23796900 |
| C | -4.18706800 | -0.50510000 | -0.06618000 |
| C | -3.23869700 | 0.54058000  | -0.12833600 |
| C | -3.68838500 | 1.84657400  | -0.36875600 |
| H | -5.39471400 | 3.10004000  | -0.72758000 |
| H | -7.03274700 | 1.23968400  | -0.61238800 |
| H | -6.26932000 | -1.08383100 | -0.18682000 |
| H | -2.97659000 | 2.66591900  | -0.41914500 |
| C | -1.84020000 | -1.33688200 | 0.29671200  |
| C | -0.62277100 | -2.00200900 | 0.52986800  |
| C | 0.55193500  | -1.27596300 | 0.54449100  |
| C | 0.55636900  | 0.12804900  | 0.28824600  |
| C | -0.68801800 | 0.78518500  | 0.08057600  |
| C | -1.87852500 | 0.06118000  | 0.08188400  |
| H | -0.60459600 | -3.07260500 | 0.71268800  |
| H | 1.48726100  | -1.77718900 | 0.76810300  |
| H | -0.68863300 | 1.85313300  | -0.10621200 |
| S | -3.43322300 | -2.07532200 | 0.24213000  |
| C | 1.76573700  | 0.91516300  | 0.34166100  |

|   |            |             |             |
|---|------------|-------------|-------------|
| C | 3.13075000 | 0.49846900  | 0.10762800  |
| C | 4.19861900 | 1.25298300  | 0.66158400  |
| C | 3.45389800 | -0.60248200 | -0.72559000 |
| C | 5.52085200 | 0.90148400  | 0.42665100  |
| H | 3.96700700 | 2.10258600  | 1.29470700  |
| C | 4.77502500 | -0.96490000 | -0.94835200 |
| H | 2.66023900 | -1.15909700 | -1.21286500 |
| C | 5.79387700 | -0.20844500 | -0.36896600 |
| H | 6.34181100 | 1.46521700  | 0.85800300  |
| H | 5.03074200 | -1.81005100 | -1.57937100 |
| O | 1.56746700 | 2.17256500  | 0.71197900  |
| F | 7.07749100 | -0.55877400 | -0.59396600 |

# CIBDBT Singlet

|    |             |             |             |
|----|-------------|-------------|-------------|
| C  | -5.46030800 | 2.01151200  | -0.62602400 |
| C  | -6.36443600 | 0.94021700  | -0.56393700 |
| C  | -5.91840800 | -0.35260400 | -0.29837500 |
| C  | -4.55222500 | -0.55465900 | -0.09633900 |
| C  | -3.62641100 | 0.51101200  | -0.15503800 |
| C  | -4.09986100 | 1.80325300  | -0.42351400 |
| H  | -5.82610700 | 3.01281700  | -0.83402200 |
| H  | -7.42411100 | 1.11779200  | -0.72388700 |
| H  | -6.61805100 | -1.18177900 | -0.24960000 |
| H  | -3.40549300 | 2.63752000  | -0.47218500 |
| C  | -2.19567900 | -1.32976000 | 0.32369200  |
| C  | -0.96772100 | -1.96413800 | 0.59338400  |
| C  | 0.18967300  | -1.21228000 | 0.61895500  |
| C  | 0.16974600  | 0.18944900  | 0.34034900  |
| C  | -1.08764200 | 0.81659100  | 0.10245200  |
| C  | -2.26052700 | 0.06545100  | 0.08852500  |
| H  | -0.93040100 | -3.03028600 | 0.79746300  |
| H  | 1.13028200  | -1.68852600 | 0.87263900  |
| H  | -1.10934900 | 1.88224500  | -0.09367500 |
| S  | -3.76970000 | -2.10395700 | 0.25072900  |
| C  | 1.36221000  | 0.99821900  | 0.39511900  |
| C  | 2.72748900  | 0.59994700  | 0.18156600  |
| C  | 3.78713600  | 1.38513900  | 0.71709900  |
| C  | 3.07692300  | -0.52159000 | -0.61912400 |
| C  | 5.11288300  | 1.04167000  | 0.50402700  |
| H  | 3.54488300  | 2.25101900  | 1.32281100  |
| C  | 4.40226200  | -0.87033500 | -0.82317800 |
| H  | 2.29718000  | -1.10229300 | -1.10069700 |
| C  | 5.42042900  | -0.09030900 | -0.25853900 |
| H  | 5.91135800  | 1.63815200  | 0.93300100  |
| H  | 4.65639100  | -1.73114700 | -1.43291400 |
| O  | 1.14091500  | 2.26257700  | 0.73597400  |
| Cl | 7.09812400  | -0.53197200 | -0.52500000 |

## CIBDBT Triplet

|    |             |             |             |
|----|-------------|-------------|-------------|
| C  | -5.44208000 | 2.02824700  | -0.64776600 |
| C  | -6.35457000 | 0.96379500  | -0.58688900 |
| C  | -5.91954500 | -0.33113300 | -0.31521400 |
| C  | -4.55547500 | -0.54233500 | -0.10588300 |
| C  | -3.62149900 | 0.51637800  | -0.16327500 |
| C  | -4.08412900 | 1.81102700  | -0.43785300 |
| H  | -5.79954600 | 3.03151600  | -0.86063100 |
| H  | -7.41204300 | 1.14883400  | -0.75260800 |
| H  | -6.62530400 | -1.15512700 | -0.26720100 |
| H  | -3.38368900 | 2.64023800  | -0.48542500 |
| C  | -2.20671400 | -1.33270200 | 0.32916700  |
| C  | -0.98658200 | -1.97598700 | 0.60444800  |
| C  | 0.17696600  | -1.23197900 | 0.63584800  |
| C  | 0.16604500  | 0.16569500  | 0.35354600  |
| C  | -1.08038000 | 0.80166900  | 0.10504500  |
| C  | -2.26041900 | 0.06082400  | 0.08877100  |
| H  | -0.95779300 | -3.04293900 | 0.80589300  |
| H  | 1.11398200  | -1.71448200 | 0.89105500  |
| H  | -1.09100000 | 1.86656300  | -0.09779500 |
| S  | -3.78602800 | -2.09523400 | 0.24853200  |
| C  | 1.36537100  | 0.97469700  | 0.42479700  |
| C  | 2.73382900  | 0.58358900  | 0.19629500  |
| C  | 3.78795400  | 1.37361900  | 0.72736000  |
| C  | 3.08195300  | -0.53129500 | -0.60851800 |
| C  | 5.11588100  | 1.04461200  | 0.49848100  |
| H  | 3.54228100  | 2.23405700  | 1.34067000  |
| C  | 4.40953400  | -0.86790400 | -0.82724700 |
| H  | 2.30231800  | -1.11969700 | -1.08108300 |
| C  | 5.42494200  | -0.08036500 | -0.27165900 |
| H  | 5.91302400  | 1.64729700  | 0.92124900  |
| H  | 4.66485600  | -1.72591600 | -1.44045000 |
| O  | 1.12713900  | 2.21731100  | 0.81458500  |
| Cl | 7.10504500  | -0.50634200 | -0.55668100 |

## BrBDBT Singlet

|   |             |             |             |
|---|-------------|-------------|-------------|
| C | -6.21050800 | 1.93311600  | -0.71682700 |
| C | -7.09382500 | 0.84468500  | -0.65314600 |
| C | -6.62690300 | -0.43403300 | -0.35701700 |
| C | -5.26100200 | -0.60459300 | -0.12606700 |
| C | -4.35596800 | 0.47871600  | -0.18585700 |
| C | -4.85024100 | 1.75626400  | -0.48537800 |
| H | -6.59243300 | 2.92304700  | -0.94889300 |
| H | -8.15363700 | 0.99774700  | -0.83590200 |
| H | -7.31045600 | -1.27644900 | -0.30700800 |
| H | -4.17205900 | 2.60365600  | -0.53552300 |
| C | -2.89758500 | -1.32403400 | 0.35075800  |
| C | -1.66252200 | -1.92843100 | 0.65386200  |
| C | -0.52120500 | -1.15251100 | 0.68786700  |

|    |             |             |             |
|----|-------------|-------------|-------------|
| C  | -0.56440900 | 0.24345800  | 0.38514900  |
| C  | -1.82914500 | 0.84055600  | 0.11350600  |
| C  | -2.98622800 | 0.06539700  | 0.09060800  |
| H  | -1.60744700 | -2.99001300 | 0.87682500  |
| H  | 0.42394500  | -1.60501000 | 0.96690900  |
| H  | -1.86873500 | 1.90217800  | -0.10093600 |
| S  | -4.45409700 | -2.13147300 | 0.26203300  |
| C  | 0.61064700  | 1.07739800  | 0.44804700  |
| C  | 1.98679600  | 0.70410000  | 0.26386000  |
| C  | 3.02117800  | 1.52074700  | 0.80270300  |
| C  | 2.37257100  | -0.42387500 | -0.51128000 |
| C  | 4.35699100  | 1.20084700  | 0.61727800  |
| H  | 2.75133400  | 2.39182300  | 1.38906800  |
| C  | 3.70820200  | -0.74769800 | -0.68749600 |
| H  | 1.61332500  | -1.02929800 | -0.99525000 |
| C  | 4.69992500  | 0.06289300  | -0.11995200 |
| H  | 5.13481100  | 1.82182900  | 1.04881300  |
| H  | 3.98907000  | -1.61378900 | -1.27726500 |
| O  | 0.35850400  | 2.34258900  | 0.76314900  |
| Br | 6.53740500  | -0.38402500 | -0.37149300 |

#### BrBDBT Triplet

|   |             |             |             |
|---|-------------|-------------|-------------|
| C | -6.19047000 | 1.95231500  | -0.74290200 |
| C | -7.08324300 | 0.87132700  | -0.68104600 |
| C | -6.62878900 | -0.40985000 | -0.37781300 |
| C | -5.26536000 | -0.59049100 | -0.13794400 |
| C | -4.35107300 | 0.48524200  | -0.19578200 |
| C | -4.83305900 | 1.76555800  | -0.50243400 |
| H | -6.56292500 | 2.94448600  | -0.98063000 |
| H | -8.14056100 | 1.03259200  | -0.87084800 |
| H | -7.31930400 | -1.24661700 | -0.32904300 |
| H | -4.14795900 | 2.60743200  | -0.55101100 |
| C | -2.91086100 | -1.32684300 | 0.35691700  |
| C | -1.68435400 | -1.94109100 | 0.66738300  |
| C | -0.53623900 | -1.17376800 | 0.70829100  |
| C | -0.56872800 | 0.21817700  | 0.40123800  |
| C | -1.82178400 | 0.82510400  | 0.11737600  |
| C | -2.98675200 | 0.06099600  | 0.09092600  |
| H | -1.63890900 | -3.00360600 | 0.88825400  |
| H | 0.40471500  | -1.63321400 | 0.99019800  |
| H | -1.84898000 | 1.88600500  | -0.10404800 |
| S | -4.47328000 | -2.12158300 | 0.25894600  |
| C | 0.61347500  | 1.05176500  | 0.48147200  |
| C | 1.99283000  | 0.68387900  | 0.28409500  |
| C | 3.02177200  | 1.50431600  | 0.81922800  |
| C | 2.37698200  | -0.43816000 | -0.49444500 |
| C | 4.35968700  | 1.19722400  | 0.61955600  |
| H | 2.74858500  | 2.37050700  | 1.41254500  |
| C | 3.71477000  | -0.75153700 | -0.68376200 |

|    |            |             |             |
|----|------------|-------------|-------------|
| H  | 1.61779000 | -1.05050000 | -0.96997000 |
| C  | 4.70378600 | 0.06555300  | -0.12449600 |
| H  | 5.13627700 | 1.82358000  | 1.04553400  |
| H  | 3.99669000 | -1.61538000 | -1.27634900 |
| O  | 0.34480300 | 2.29613000  | 0.84430500  |
| Br | 6.54380300 | -0.36678000 | -0.39392400 |

#### XA Singlet

|   |             |             |             |
|---|-------------|-------------|-------------|
| C | -0.96562100 | -0.00002600 | 3.59822200  |
| C | -1.60002800 | 0.00002800  | 2.35147100  |
| C | -0.83868100 | 0.00011200  | 1.19188400  |
| C | 0.57860700  | -0.00001300 | 1.24011900  |
| C | 1.19841700  | 0.00003200  | 2.51319800  |
| C | 0.43116100  | 0.00004900  | 3.67173800  |
| C | 1.28507000  | -0.00011800 | 0.00000000  |
| C | 0.57860700  | -0.00001300 | -1.24011900 |
| C | -0.83868100 | 0.00011200  | -1.19188400 |
| C | -1.60002800 | 0.00002800  | -2.35147100 |
| H | -2.68146900 | -0.00005400 | -2.26160400 |
| C | -0.96562100 | -0.00002600 | -3.59822200 |
| C | 0.43116100  | 0.00004900  | -3.67173800 |
| C | 1.19841700  | 0.00003200  | -2.51319800 |
| H | -1.56359400 | -0.00007500 | 4.50422500  |
| H | -2.68146900 | -0.00005400 | 2.26160400  |
| H | 2.28117600  | -0.00000400 | 2.57625200  |
| H | 0.92468200  | 0.00011600  | 4.63928400  |
| H | -1.56359400 | -0.00007500 | -4.50422500 |
| H | 0.92468200  | 0.00011600  | -4.63928400 |
| H | 2.28117600  | -0.00000400 | -2.57625200 |
| O | 2.61044100  | -0.00003800 | 0.00000000  |
| O | -1.52022500 | -0.00014200 | 0.00000000  |

#### XA Triplet

|   |             |             |             |
|---|-------------|-------------|-------------|
| C | -0.96398600 | -0.00023600 | 3.60055000  |
| C | -1.60019800 | -0.00006000 | 2.35425600  |
| C | -0.84067400 | 0.00015100  | 1.19329000  |
| C | 0.57562300  | 0.00000500  | 1.24385000  |
| C | 1.19837400  | -0.00006300 | 2.51353800  |
| C | 0.43283200  | -0.00017900 | 3.67376900  |
| C | 1.28553200  | -0.00006500 | 0.00000000  |
| C | 0.57562300  | 0.00000500  | -1.24385000 |
| C | -0.84067400 | 0.00015100  | -1.19329000 |
| C | -1.60019800 | -0.00006000 | -2.35425600 |
| H | -2.68193100 | -0.00009600 | -2.26651000 |
| C | -0.96398600 | -0.00023600 | -3.60055000 |
| C | 0.43283200  | -0.00017900 | -3.67376900 |
| C | 1.19837400  | -0.00006300 | -2.51353800 |
| H | -1.56138700 | -0.00039600 | 4.50703800  |

|   |             |             |             |
|---|-------------|-------------|-------------|
| H | -2.68193100 | -0.00009600 | 2.26651000  |
| H | 2.28243700  | -0.00003200 | 2.56858100  |
| H | 0.92722000  | -0.00018900 | 4.64091200  |
| H | -1.56138700 | -0.00039600 | -4.50703800 |
| H | 0.92722000  | -0.00018900 | -4.64091200 |
| H | 2.28243700  | -0.00003200 | -2.56858100 |
| O | 2.61458100  | 0.00025400  | 0.00000000  |
| O | -1.52327100 | 0.00054500  | 0.00000000  |

#### AR Singlet

|   |             |             |             |
|---|-------------|-------------|-------------|
| C | -0.94577400 | 0.00018400  | 3.64563100  |
| C | -1.60405200 | 0.00001100  | 2.41453200  |
| C | -0.85690100 | -0.00014500 | 1.23311000  |
| C | 0.57766100  | -0.00008800 | 1.24294200  |
| C | 1.21054600  | 0.00009900  | 2.50471700  |
| C | 0.45985100  | 0.00015900  | 3.67520300  |
| C | 1.30177900  | -0.00020400 | 0.00000000  |
| C | 0.57766100  | -0.00008800 | -1.24294200 |
| C | -0.85690100 | -0.00014500 | -1.23311000 |
| C | -1.60405200 | 0.00001100  | -2.41453200 |
| H | -2.69095400 | 0.00021700  | -2.36422800 |
| C | -0.94577400 | 0.00018400  | -3.64563100 |
| C | 0.45985100  | 0.00015900  | -3.67520300 |
| C | 1.21054600  | 0.00009900  | -2.50471700 |
| H | -1.51691600 | -0.00007600 | 4.56808800  |
| H | -2.69095400 | 0.00021700  | 2.36422800  |
| H | 2.29406600  | 0.00033600  | 2.52570900  |
| H | 0.97177700  | 0.00029700  | 4.63416300  |
| H | -1.51691600 | -0.00007600 | -4.56808800 |
| H | 0.97177700  | 0.00029700  | -4.63416300 |
| H | 2.29406600  | 0.00033600  | -2.52570900 |
| O | 2.61018200  | -0.00016200 | 0.00000000  |
| N | -1.48620800 | -0.00017000 | 0.00000000  |
| H | -2.50059600 | -0.00045700 | 0.00000000  |

#### AR Triplet

|   |             |             |             |
|---|-------------|-------------|-------------|
| C | -0.91529000 | -0.00030800 | 3.65278100  |
| C | -1.58469600 | -0.00004600 | 2.42437800  |
| C | -0.86626000 | 0.00019800  | 1.22854300  |
| C | 0.55869600  | 0.00009800  | 1.25435600  |
| C | 1.21363300  | -0.00014400 | 2.50713200  |
| C | 0.48197300  | -0.00031500 | 3.69014800  |
| C | 1.24965800  | 0.00020700  | 0.00000000  |
| C | 0.55869600  | 0.00009800  | -1.25435600 |
| C | -0.86626000 | 0.00019800  | -1.22854300 |
| C | -1.58469600 | -0.00004600 | -2.42437800 |
| H | -2.67211700 | -0.00001400 | -2.39062700 |

|   |             |             |             |
|---|-------------|-------------|-------------|
| C | -0.91529000 | -0.00030800 | -3.65278100 |
| C | 0.48197300  | -0.00031500 | -3.69014800 |
| C | 1.21363300  | -0.00014400 | -2.50713200 |
| H | -1.48949700 | -0.00053500 | 4.57440200  |
| H | -2.67211700 | -0.00001400 | 2.39062700  |
| H | 2.29888700  | -0.00022000 | 2.53230800  |
| H | 1.00236600  | -0.00049400 | 4.64353000  |
| H | -1.48949700 | -0.00053500 | -4.57440200 |
| H | 1.00236600  | -0.00049400 | -4.64353000 |
| H | 2.29888700  | -0.00022000 | -2.53230800 |
| O | 2.58310100  | 0.00034500  | 0.00000000  |
| N | -1.51103800 | 0.00065300  | 0.00000000  |
| H | -2.52144200 | 0.00015000  | 0.00000000  |

#### AD Singlet

|   |             |             |             |
|---|-------------|-------------|-------------|
| C | -0.62853300 | 0.00018900  | 3.81586500  |
| C | -1.39993100 | 0.00012500  | 2.65827500  |
| C | -0.78508900 | -0.00006900 | 1.40274500  |
| C | 0.64342600  | -0.00008200 | 1.26733900  |
| C | 1.39739600  | -0.00003200 | 2.47532900  |
| C | 0.77734200  | 0.00008100  | 3.70881500  |
| C | 1.30629600  | -0.00003700 | 0.00000000  |
| C | 0.64342600  | -0.00008200 | -1.26733900 |
| C | -0.78508900 | -0.00006900 | -1.40274500 |
| C | -1.39993100 | 0.00012500  | -2.65827500 |
| H | -2.48504900 | 0.00028800  | -2.72368800 |
| C | -0.62853300 | 0.00018900  | -3.81586500 |
| C | 0.77734200  | 0.00008100  | -3.70881500 |
| C | 1.39739600  | -0.00003200 | -2.47532900 |
| H | -1.10782300 | 0.00021900  | 4.78963400  |
| H | -2.48504900 | 0.00028800  | 2.72368800  |
| H | 2.47701600  | -0.00006300 | 2.38958700  |
| H | 1.38385500  | 0.00009500  | 4.61062000  |
| H | -1.10782300 | 0.00021900  | -4.78963400 |
| H | 1.38385500  | 0.00009500  | -4.61062000 |
| H | 2.47701600  | -0.00006300 | -2.38958700 |
| O | 2.65100500  | -0.00002100 | 0.00000000  |
| S | -1.85232100 | -0.00020300 | 0.00000000  |

#### AD Triplet

|   |             |             |             |
|---|-------------|-------------|-------------|
| C | -0.64375900 | -0.00026000 | 3.81252200  |
| C | -1.40780700 | -0.00016800 | 2.65249200  |
| C | -0.77873600 | -0.00000300 | 1.39924000  |
| C | 0.64977200  | 0.00003200  | 1.26563200  |
| C | 1.39190800  | -0.00001500 | 2.47407400  |
| C | 0.76295500  | -0.00017000 | 3.70656400  |
| C | 1.34226700  | 0.00014900  | 0.00000000  |
| C | 0.64977200  | 0.00003200  | -1.26563200 |

|   |             |             |             |
|---|-------------|-------------|-------------|
| C | -0.77873600 | -0.00000300 | -1.39924000 |
| C | -1.40780700 | -0.00016800 | -2.65249200 |
| H | -2.49350100 | -0.00016100 | -2.70860200 |
| C | -0.64375900 | -0.00026000 | -3.81252200 |
| C | 0.76295500  | -0.00017000 | -3.70656400 |
| C | 1.39190800  | -0.00001500 | -2.47407400 |
| H | -1.12530700 | -0.00044600 | 4.78489200  |
| H | -2.49350100 | -0.00016100 | 2.70860200  |
| H | 2.47189600  | 0.00006800  | 2.38791600  |
| H | 1.36590200  | -0.00021900 | 4.61103000  |
| H | -1.12530700 | -0.00044600 | -4.78489200 |
| H | 1.36590200  | -0.00021900 | -4.61103000 |
| H | 2.47189600  | 0.00006800  | -2.38791600 |
| O | 2.64545500  | 0.00022100  | 0.00000000  |
| S | -1.83420100 | 0.00036600  | 0.00000000  |



**Table S2:** The geometry optimization with TDDFT and UDFT for HA are singlet and triplet, respectively.  $\Delta E_1$  and  $\Delta E_2$  (in eV) are the energy difference between the first excited triplet states and the second excited triplet states obtained by TDDFT and the ground states. The ground states and excited states energy calculated by UDFT are  $E_s$  and  $E_t$  (in a.u.).

|           |             | Singlet      |              |           |           | Triplet      |              |           |           |
|-----------|-------------|--------------|--------------|-----------|-----------|--------------|--------------|-----------|-----------|
|           |             | $\Delta E_1$ | $\Delta E_2$ | $E_s$     | $E_t$     | $\Delta E_1$ | $\Delta E_2$ | $E_s$     | $E_t$     |
| PBE       | cc-pvdz     | 1.4564       | 1.6708*      | -763.1686 | -763.0374 | 1.4651       | 1.6702*      | -763.1690 | -763.0823 |
|           | cc-pvtz     | 1.4720       | 1.6711*      | -763.3662 | -763.2298 | 1.4801       | 1.6707*      | -763.3664 | -763.2189 |
|           | aug-cc-pvdz | 1.4654       | 1.6762*      | -763.2114 | -763.0936 | 1.4735       | 1.6757*      | -763.2117 | -763.0920 |
|           | aug-cc-pvtz | 1.4698       | 1.6738*      | -763.3761 | -763.2941 | 1.4777       | 1.6734*      | -763.3763 | -763.0920 |
| PBE0      | cc-pvdz     | 1.7490       | 1.9556       | -763.2029 | -763.1277 | 1.7501       | 1.9626       | -763.2030 | -763.1277 |
|           | cc-pvtz     | 1.7453       | 1.9692       | -763.3881 | -763.3141 | 1.7467       | 1.9759       | -763.3882 | -763.3125 |
|           | aug-cc-pvdz | 1.7632       | 1.9782       | -763.2395 | -763.1647 | 1.7647       | 1.9850       | -763.2396 | -763.1647 |
|           | aug-cc-pvtz | 1.7476       | 1.9729       | -763.3961 | -763.3208 | 1.7491       | 1.9794       | -763.3962 | -763.3208 |
| B3LYP     | cc-pvdz     | 1.7966       | 1.9342       | -764.0532 | -763.9763 | 1.7972       | 1.9411       | -764.0534 | -763.9765 |
|           | cc-pvtz     | 1.7968       | 1.9574       | -764.2647 | -764.1886 | 1.7976       | 1.9639       | -764.2648 | -764.1886 |
|           | aug-cc-pvdz | 1.8035       | 1.9576       | -764.0955 | -764.0194 | 1.8044       | 1.9642       | -764.0958 | -764.0196 |
|           | aug-cc-pvtz | 1.7970       | 1.9611       | -764.2736 | -764.1978 | 1.7979       | 1.9675       | -764.2737 | -764.1978 |
| CAM-B3LYP | cc-pvdz     | 1.8504       | 2.2322       | -763.6719 | -763.5906 | 1.8528       | 2.2378       | -763.6721 | -763.5907 |
|           | cc-pvtz     | 1.8642       | 2.2635       | -763.8871 | -763.8068 | 1.8669       | 2.2688       | -763.8871 | -763.8068 |

|        |             |        |         |           |           |        |         |           |           |
|--------|-------------|--------|---------|-----------|-----------|--------|---------|-----------|-----------|
| WB97XD | aug-cc-pvdz | 1.8776 | 2.2664  | -763.7156 | -763.6355 | 1.8805 | 2.2718  | -763.7157 | -763.6356 |
|        | aug-cc-pvtz | 1.8691 | 2.2691  | -763.8961 | -763.8163 | 1.8720 | 2.2743  | -763.8961 | -763.8163 |
|        | cc-pvdz     | 1.9751 | 2.2580  | -763.7979 | -763.7145 | 1.9773 | 2.2640  | -763.7980 | -763.7146 |
|        | cc-pvtz     | 1.9709 | 2.2757  | -763.9885 | -763.9064 | 1.9735 | 2.2814  | -763.9885 | -763.9064 |
|        | aug-cc-pvdz | 1.9900 | 2.2863  | -763.8332 | -763.7532 | 1.9926 | 2.2921  | -763.8334 | -763.7532 |
|        | aug-cc-pvtz | 1.9736 | 2.2804  | -763.9967 | -763.9150 | 1.9762 | 2.2861  | -763.9968 | -763.9150 |
| M062X  | cc-pvdz     | 2.1550 | 2.2099  | -763.7836 | -763.6971 | 2.1553 | 2.2143  | -763.7838 | -763.6973 |
|        | cc-pvtz     | 2.1313 | 2.2836  | -763.9675 | -763.8823 | 2.1320 | 2.2877  | -763.9675 | -763.8824 |
|        | aug-cc-pvdz | 2.1536 | 2.2412  | -763.8211 | -763.7360 | 2.1544 | 2.2455  | -763.8213 | -763.7361 |
|        | aug-cc-pvtz | 2.1283 | 2.2927  | -763.9761 | -763.8961 | 2.1292 | 2.2967  | -763.9762 | -763.8960 |
| M06HF  | cc-pvdz     | 1.9965 | 2.4240* | -763.8777 | -763.7859 | 1.9990 | 2.4227* | -763.8778 | -763.7860 |
|        | cc-pvtz     | 2.1305 | 2.3006* | -764.1273 | -764.0372 | 2.1330 | 2.2996* | -764.1274 | -764.0372 |
|        | aug-cc-pvdz | 2.0641 | 2.4180* | -763.9265 | -763.8365 | 2.0668 | 2.4179* | -763.9266 | -763.8367 |
|        | aug-cc-pvtz | 2.1441 | 2.2939* | -764.1478 | -764.0583 | 2.1465 | 2.2934* | -764.1478 | -764.0584 |

**Table S3:** The geometry optimization with TDDFT and UDFT for AAT are singlet and triplet, respectively.  $\Delta E_1$  and  $\Delta E_2$  (in eV) are the energy difference between the first excited triplet states and the second excited triplet states obtained by TDDFT and the ground states. The ground states and excited states energy calculated by UDFT are  $E_s$  and  $E_t$  (in a.u.).

|  | Singlet | Triplet |
|--|---------|---------|
|--|---------|---------|

|           |             | $\Delta E_1$ | $\Delta E_2$ | $E_s$     | $E_t$     | $\Delta E_1$ | $\Delta E_2$ | $E_s$     | $E_t$     |
|-----------|-------------|--------------|--------------|-----------|-----------|--------------|--------------|-----------|-----------|
| PBE       | cc-pvdz     | 1.2479       | 1.7396       | -743.3080 | -743.2495 | 1.2778       | 1.7606       | -743.3089 | -743.2499 |
|           | cc-pvtz     | 1.2515       | 1.7452       | -743.4994 | -743.4398 | 1.2808       | 1.7657       | -743.5001 | -743.4403 |
|           | aug-cc-pvdz | 1.2553       | 1.7343       | -743.3500 | -743.2920 | 1.2845       | 1.7545       | -743.3507 | -743.2924 |
|           | aug-cc-pvtz | 1.2549       | 1.7370       | -743.5093 | -743.4500 | 1.2840       | 1.7571       | -743.5100 | -743.4505 |
| PBE0      | cc-pvdz     | 1.3515       | 2.2710       | -743.3476 | -743.2874 | 1.3696       | 2.2940       | -743.3484 | -743.2880 |
|           | cc-pvtz     | 1.3431       | 2.2709       | -743.5263 | -743.4672 | 1.3611       | 2.2933       | -743.5271 | -743.4675 |
|           | aug-cc-pvdz | 1.3488       | 2.2736       | -743.3831 | -743.3240 | 1.3669       | 2.2956       | -743.3838 | -743.3244 |
|           | aug-cc-pvtz | 1.3445       | 2.2672       | -743.5343 | -743.4755 | 1.3625       | 2.2891       | -743.5351 | -743.4758 |
| B3LYP     | cc-pvdz     | 1.3689       | 2.2447       | -744.1824 | -744.1210 | 1.3898       | 2.2676       | -744.1831 | -744.1215 |
|           | cc-pvtz     | 1.3647       | 2.2564       | -744.3883 | -744.3278 | 1.3856       | 2.2787       | -744.3889 | -744.3281 |
|           | aug-cc-pvdz | 1.3684       | 2.2491       | -744.2243 | -744.1640 | 1.3894       | 2.2710       | -744.2249 | -744.1643 |
|           | aug-cc-pvtz | 1.3672       | 2.2524       | -744.3972 | -744.3370 | 1.3880       | 2.2742       | -744.3978 | -744.3373 |
| CAM-B3LYP | cc-pvdz     | 1.5111       | 2.5246       | -743.7981 | -743.7354 | 1.5145       | 2.5329       | -743.7989 | -743.7358 |
|           | cc-pvtz     | 1.4984       | 2.5458       | -744.0074 | -743.9458 | 1.5021       | 2.5508       | -744.0080 | -743.9461 |
|           | aug-cc-pvdz | 1.4995       | 2.5545       | -743.8410 | -743.7797 | 1.5038       | 2.5591       | -743.8417 | -743.7799 |
|           | aug-cc-pvtz | 1.4981       | 2.5505       | -744.0164 | -743.9552 | 1.5022       | 2.5534       | -744.0170 | -743.9554 |
| WB97XD    | cc-pvdz     | 1.5828       | 2.5652       | -743.9335 | -743.8692 | 1.5845       | 2.5880       | -743.9342 | -743.8696 |
|           | cc-pvtz     | 1.5717       | 2.5688       | -744.1175 | -744.0544 | 1.5735       | 2.5910       | -744.1181 | -744.0546 |
|           | aug-cc-pvdz | 1.5761       | 2.5713       | -743.9679 | -743.9049 | 1.5783       | 2.5930       | -743.9685 | -743.9051 |

|       |             |        |        |           |           |        |        |           |           |
|-------|-------------|--------|--------|-----------|-----------|--------|--------|-----------|-----------|
| M062X | aug-cc-pvtz | 1.5732 | 2.5657 | -744.1257 | -744.0629 | 1.5751 | 2.5873 | -744.1264 | -744.0631 |
|       | cc-pvdz     | 1.7111 | 2.5195 | -743.9150 | -743.8482 | 1.7075 | 2.5418 | -743.9157 | -743.8486 |
|       | cc-pvtz     | 1.6969 | 2.5750 | -744.0928 | -744.0272 | 1.6951 | 2.5965 | -744.0934 | -744.0275 |
|       | aug-cc-pvdz | 1.7005 | 2.5279 | -743.9521 | -743.8865 | 1.6986 | 2.5491 | -743.9528 | -743.8868 |
|       | aug-cc-pvtz | 1.6951 | 2.5750 | -744.1016 | -744.0364 | 1.6939 | 2.5961 | -744.1022 | -744.0366 |
| M06HF | cc-pvdz     | 1.9883 | 2.2822 | -744.0116 | -743.9422 | 1.9456 | 2.3025 | -744.0125 | -743.9429 |
|       | cc-pvtz     | 1.9501 | 2.3892 | -744.2549 | -744.1872 | 1.9172 | 2.4084 | -744.2557 | -744.1875 |
|       | aug-cc-pvdz | 1.9663 | 2.3187 | -744.0606 | -743.9926 | 1.9302 | 2.3377 | -744.0614 | -743.9930 |
|       | aug-cc-pvtz | 1.9387 | 2.3949 | -744.2760 | -744.2086 | 1.9090 | 2.4137 | -744.2768 | -744.2089 |

**Table S4:** The geometry optimization with TDDFT and UDFT for BP are singlet and triplet, respectively.  $\Delta E_1$  and  $\Delta E_2$  (in eV) are the energy difference between the first excited triplet states and the second excited triplet states obtained by TDDFT and the ground states. The ground states and excited states energy calculated by UDFT are  $E_s$  and  $E_t$  (in a.u.).

|     |             | Singlet      |              |           |           | Triplet      |              |           |           |
|-----|-------------|--------------|--------------|-----------|-----------|--------------|--------------|-----------|-----------|
|     |             | $\Delta E_1$ | $\Delta E_2$ | $E_s$     | $E_t$     | $\Delta E_1$ | $\Delta E_2$ | $E_s$     | $E_t$     |
| PBE | cc-pvdz     | 1.8108       | 2.6989       | -575.9319 | -575.8497 | 1.8453       | 2.7454       | -575.9330 | -575.8497 |
|     | cc-pvtz     | 1.8441       | 2.6861       | -576.0823 | -576.0000 | 1.8776       | 2.7317       | -576.0834 | -576.0002 |
|     | aug-cc-pvdz | 1.8498       | 2.6941       | -575.9622 | -575.8794 | 1.8827       | 2.7389       | -575.9632 | -575.8795 |
|     | aug-cc-pvtz | 1.8527       | 2.6812       | -576.0891 | -576.0068 | 1.8856       | 2.7261       | -576.0901 | -576.0069 |

|           |             |        |        |           |           |        |        |           |           |
|-----------|-------------|--------|--------|-----------|-----------|--------|--------|-----------|-----------|
| PBE0      | cc-pvdz     | 2.0304 | 2.5229 | -575.9805 | -575.8996 | 2.0712 | 2.5691 | -575.9819 | -575.8998 |
|           | cc-pvtz     | 2.0692 | 2.5309 | -576.1193 | -576.0387 | 2.1091 | 2.5753 | -576.1207 | -576.0389 |
|           | aug-cc-pvdz | 2.1005 | 2.5556 | -576.0052 | -575.9235 | 2.1388 | 2.5998 | -576.0065 | -575.9237 |
|           | aug-cc-pvtz | 2.0906 | 2.5373 | -576.1246 | -576.0439 | 2.1296 | 2.5809 | -576.1260 | -576.0442 |
| B3LYP     | cc-pvdz     | 2.0767 | 2.6019 | -576.6506 | -576.5668 | 2.1136 | 2.6505 | -576.6519 | -576.5670 |
|           | cc-pvtz     | 2.1252 | 2.6187 | -576.8142 | -576.7301 | 2.1610 | 2.6658 | -576.8155 | -576.7303 |
|           | aug-cc-pvdz | 2.1451 | 2.6323 | -576.6810 | -576.5963 | 2.1798 | 2.6789 | -576.6822 | -576.5964 |
|           | aug-cc-pvtz | 2.1461 | 2.6235 | -576.8202 | -576.7361 | 2.1811 | 2.6699 | -576.8215 | -576.7362 |
| CAM-B3LYP | cc-pvdz     | 2.1285 | 2.6329 | -576.3248 | -576.2401 | 2.1758 | 2.6720 | -576.3263 | -576.2403 |
|           | cc-pvtz     | 2.186  | 2.6696 | -576.4908 | -576.4058 | 2.2321 | 2.7066 | -576.4924 | -576.4061 |
|           | aug-cc-pvdz | 2.2143 | 2.6819 | -576.3558 | -576.2700 | 2.2588 | 2.7183 | -576.3572 | -576.2702 |
|           | aug-cc-pvtz | 2.2112 | 2.679  | -576.4969 | -576.4118 | 2.2563 | 2.7150 | -576.4984 | -576.4121 |
| WB97XD    | cc-pvdz     | 2.2408 | 2.7201 | -576.4533 | -576.3662 | 2.2829 | 2.7639 | -576.4547 | -576.3664 |
|           | cc-pvtz     | 2.2793 | 2.7324 | -576.5977 | -576.5109 | 2.3210 | 2.7739 | -576.5992 | -576.5113 |
|           | aug-cc-pvdz | 2.3111 | 2.7551 | -576.4776 | -576.3897 | 2.3511 | 2.7964 | -576.4790 | -576.3899 |
|           | aug-cc-pvtz | 2.2998 | 2.7391 | -576.6033 | -576.5165 | 2.3408 | 2.7797 | -576.6048 | -576.5168 |
| M062X     | cc-pvdz     | 2.2744 | 2.794  | -576.4281 | -576.3393 | 2.3070 | 2.8495 | -576.4297 | -576.3395 |
|           | cc-pvtz     | 2.3525 | 2.8028 | -576.5681 | -576.4792 | 2.3871 | 2.8529 | -576.5696 | -576.4795 |
|           | aug-cc-pvdz | 2.3379 | 2.8169 | -576.4547 | -576.3654 | 2.3692 | 2.8695 | -576.4562 | -576.3656 |
|           | aug-cc-pvtz | 2.3728 | 2.8071 | -576.5739 | -576.4851 | 2.4070 | 2.8560 | -576.5754 | -576.4854 |

|       |             |        |        |           |           |        |        |           |           |
|-------|-------------|--------|--------|-----------|-----------|--------|--------|-----------|-----------|
| M06HF | cc-pvdz     | 2.0735 | 2.853  | -576.5183 | -576.4280 | 2.0901 | 2.9220 | -576.5201 | -576.4283 |
|       | cc-pvtz     | 2.2186 | 2.7516 | -576.7094 | -576.6197 | 2.2378 | 2.8134 | -576.7112 | -576.6200 |
|       | aug-cc-pvdz | 2.1733 | 2.8704 | -576.5523 | -576.4610 | 2.1883 | 2.9355 | -576.5540 | -576.4613 |
|       | aug-cc-pvtz | 2.2402 | 2.7536 | -576.7249 | -576.6355 | 2.2590 | 2.8141 | -576.7266 | -576.6358 |

**Table S5:** The geometry optimization with TDDFT and UDFT for TX-BT are singlet and triplet, respectively.  $\Delta E_1$  and  $\Delta E_2$  (in eV) are the energy difference between the first excited triplet states and the second excited triplet states obtained by TDDFT and the ground states. The ground states and excited states energy calculated by UDFT are  $E_s$  and  $E_t$  (in a.u.).

|       |             | Singlet      |              |            |            | Triplet      |              |            |            |
|-------|-------------|--------------|--------------|------------|------------|--------------|--------------|------------|------------|
|       |             | $\Delta E_1$ | $\Delta E_2$ | $E_s$      | $E_t$      | $\Delta E_1$ | $\Delta E_2$ | $E_s$      | $E_t$      |
| PBE   | cc-pvdz     | 2.7426       | 2.8744       | -1372.9808 | -1372.8736 | 2.2143       | 3.2628       | -1372.9774 | -1372.8910 |
|       | cc-pvtz     | 2.7060       | 2.8212       | -1373.1564 | -1373.0508 | 2.1840       | 3.1924       | -1373.1537 | -1373.0686 |
|       | aug-cc-pvdz | 2.7131       | 2.8254       | -1373.0133 | -1372.9075 | 2.1945       | 3.1635       | -1373.0101 | -1372.9247 |
|       | aug-cc-pvtz | 2.6936       | 2.7992       | -1373.1635 | -1373.0585 | 2.1770       | 3.1434       | -1373.1608 | -1373.0760 |
| PBE0  | cc-pvdz     | 2.6963       | 2.7337       | -1373.1021 | -1372.9881 | 1.9897       | 3.3536       | -1373.0981 | -1373.0112 |
|       | cc-pvtz     | 2.6574       | 2.6942       | -1373.2666 | -1373.1542 | 1.9619       | 3.3042       | -1373.2633 | -1373.1776 |
|       | aug-cc-pvdz | 2.6780       | 2.7098       | -1373.1288 | -1373.0162 | 1.9815       | 3.3189       | -1373.1251 | -1373.0390 |
|       | aug-cc-pvtz | 2.6508       | 2.6849       | -1373.2720 | -1373.1602 | 1.9598       | 3.2891       | -1373.2687 | -1373.1833 |
| B3LYP | cc-pvdz     | 2.7929       | 2.8430       | -1374.0702 | -1373.9564 | 2.1036       | 3.4602       | -1374.0664 | -1373.9788 |

|           |             |        |        |            |            |        |        |            |            |
|-----------|-------------|--------|--------|------------|------------|--------|--------|------------|------------|
| CAM-B3LYP | cc-pvtz     | 2.7636 | 2.8062 | -1374.2591 | -1374.1469 | 2.0843 | 3.4103 | -1374.2560 | -1374.1695 |
|           | aug-cc-pvdz | 2.7733 | 2.8136 | -1374.1022 | -1373.9899 | 2.0961 | 3.4059 | -1374.0987 | -1374.0119 |
|           | aug-cc-pvtz | 2.7556 | 2.7933 | -1374.2653 | -1374.1536 | 2.0814 | 3.3832 | -1374.2622 | -1374.1760 |
|           | cc-pvdz     | 2.6453 | 2.6946 | -1373.7163 | -1373.5968 | 1.8539 | 3.3422 | -1373.7116 | -1373.6232 |
|           | cc-pvtz     | 2.6200 | 2.6735 | -1373.9085 | -1373.7905 | 1.8421 | 3.3151 | -1373.9045 | -1373.8172 |
|           | aug-cc-pvdz | 2.6329 | 2.6809 | -1373.7487 | -1373.6306 | 1.8556 | 3.3216 | -1373.7442 | -1373.6567 |
|           | aug-cc-pvtz | 2.6154 | 2.6679 | -1373.9147 | -1373.7973 | 1.8434 | 3.3055 | -1373.9107 | -1373.8238 |
| WB97XD    | cc-pvdz     | 2.8124 | 2.8442 | -1373.8425 | -1373.7205 | 2.0122 | 3.5241 | -1373.8374 | -1373.7466 |
|           | cc-pvtz     | 2.7768 | 2.8153 | -1374.0106 | -1373.8901 | 1.9922 | 3.4827 | -1374.0061 | -1373.9165 |
|           | aug-cc-pvdz | 2.7957 | 2.8285 | -1373.8685 | -1373.7479 | 2.0094 | 3.4990 | -1373.8636 | -1373.7736 |
| M062X     | aug-cc-pvtz | 2.7706 | 2.8092 | -1374.0163 | -1373.8963 | 1.9916 | 3.4719 | -1374.0119 | -1373.9225 |
|           | cc-pvdz     | 3.2429 | 3.2730 | -1373.7953 | -1373.6668 | 2.4672 | 3.9289 | -1373.7902 | -1373.6926 |
|           | cc-pvtz     | 3.1623 | 3.1886 | -1373.9653 | -1373.8390 | 2.3966 | 3.8641 | -1373.9609 | -1373.8651 |
|           | aug-cc-pvdz | 3.1968 | 3.2173 | -1373.8240 | -1373.6974 | 2.4364 | 3.8229 | -1373.8192 | -1373.7228 |
|           | aug-cc-pvtz | 3.1446 | 3.1696 | -1373.9720 | -1373.8463 | 2.3860 | 3.8080 | -1373.9676 | -1373.8722 |
| M06HF     | cc-pvdz     | 3.5565 | 3.5746 | -1373.9030 | -1373.7605 | 2.6956 | 3.9792 | -1373.8962 | -1373.7899 |
|           | cc-pvtz     | 3.3817 | 3.4078 | -1374.1493 | -1374.0104 | 2.5333 | 3.9291 | -1374.1433 | -1374.0399 |
|           | aug-cc-pvdz | 3.4484 | 3.4809 | -1373.9405 | -1373.8012 | 2.6215 | 3.8435 | -1373.9341 | -1373.8300 |
|           | aug-cc-pvtz | 3.3306 | 3.3679 | -1374.1690 | -1374.0314 | 2.5010 | 3.8508 | -1374.1631 | -1374.0605 |

**Table S6:** The geometry optimization with TDDFT and UDFT for TX-DBT are singlet and triplet, respectively.  $\Delta E_1$  and  $\Delta E_2$  (in eV) are the energy difference between the first excited triplet states and the second excited triplet states obtained by TDDFT and the ground states. The ground states and excited states energy calculated by UDFT are  $E_s$  and  $E_t$  (in a.u.).

|           |             | Singlet      |              |            |            | Triplet      |              |            |            |
|-----------|-------------|--------------|--------------|------------|------------|--------------|--------------|------------|------------|
|           |             | $\Delta E_1$ | $\Delta E_2$ | $E_s$      | $E_t$      | $\Delta E_1$ | $\Delta E_2$ | $E_s$      | $E_t$      |
| PBE       | cc-pvdz     | 2.0178       | 2.1331*      | -1600.4260 | -1600.3429 | 2.1842       | 2.2252       | -1600.4308 | -1600.3448 |
|           | cc-pvtz     | 2.0196       | 2.0936*      | -1600.6563 | -1600.5748 | 2.1353       | 2.2237       | -1600.6612 | -1600.5771 |
|           | aug-cc-pvdz | 2.0128       | 2.0846*      | -1600.4689 | -1600.3875 | 2.1212       | 2.2144       | -1600.4734 | -1600.3896 |
|           | aug-cc-pvtz | 2.0141       | 2.0762*      | -1600.6662 | -1600.5853 | 2.1122       | 2.2156       | -1600.6710 | -1600.5878 |
| PBE0      | cc-pvdz     | 2.1677       | 2.4956       | -1600.5480 | -1600.4544 | 2.3518       | 2.6709       | -1600.5542 | -1600.4609 |
|           | cc-pvtz     | 2.1709       | 2.5106       | -1600.7646 | -1600.6774 | 2.3303       | 2.6222       | -1600.7709 | -1600.6794 |
|           | aug-cc-pvdz | 2.1948       | 2.5239       | -1600.5841 | -1600.4909 | 2.3358       | 2.6274       | -1600.5900 | -1600.4986 |
|           | aug-cc-pvtz | 2.1771       | 2.5178       | -1600.7723 | -1600.6855 | 2.3216       | 2.6076       | -1600.7785 | -1600.6877 |
| B3LYP     | cc-pvdz     | 2.2135       | 2.4568       | -1601.7643 | -1601.6762 | 2.3620       | 2.6757       | -1601.7697 | -1601.6772 |
|           | cc-pvtz     | 2.2124       | 2.4804       | -1602.0116 | -1601.9246 | 2.3334       | 2.6893       | -1602.0171 | -1601.9263 |
|           | aug-cc-pvdz | 2.2218       | 2.4852       | -1601.8064 | -1601.7194 | 2.3281       | 2.6861       | -1601.8115 | -1601.7210 |
|           | aug-cc-pvtz | 2.2109       | 2.4873       | -1602.0202 | -1601.9338 | 2.3178       | 2.6736       | -1602.0257 | -1601.9356 |
| CAM-B3LYP | cc-pvdz     | 2.2051       | 2.7359*      | -1601.3027 | -1601.2067 | 2.4235       | 2.7370       | -1601.3089 | -1601.2038 |
|           | cc-pvtz     | 2.2373       | 2.7130*      | -1601.5544 | -1601.4589 | 2.4323       | 2.6933       | -1601.5607 | -1601.4615 |



|        |             |        |         |            |            |        |        |            |            |
|--------|-------------|--------|---------|------------|------------|--------|--------|------------|------------|
| WB97XD | aug-cc-pvdz | 2.2628 | 2.7066* | -1601.3457 | -1601.2497 | 2.4451 | 2.6891 | -1601.3515 | -1601.2526 |
|        | aug-cc-pvtz | 2.2521 | 2.6942* | -1601.5632 | -1601.4679 | 2.4346 | 2.6766 | -1601.5693 | -1601.4710 |
|        | cc-pvdz     | 2.3194 | 2.7617  | -1601.4558 | -1601.3579 | 2.5255 | 2.8724 | -1601.4622 | -1601.3587 |
|        | cc-pvtz     | 2.3294 | 2.7827  | -1601.6773 | -1601.5804 | 2.5164 | 2.8232 | -1601.6838 | -1601.5822 |
|        | aug-cc-pvdz | 2.3560 | 2.7974  | -1601.4907 | -1601.3937 | 2.5298 | 2.8272 | -1601.4966 | -1601.3952 |
|        | aug-cc-pvtz | 2.3385 | 2.7908  | -1601.6855 | -1601.5892 | 2.5148 | 2.8086 | -1601.6918 | -1601.5909 |
| M062X  | cc-pvdz     | 2.3556 | 2.7058  | -1601.4164 | -1601.3176 | 2.5711 | 2.9126 | -1601.4231 | -1601.3190 |
|        | cc-pvtz     | 2.3607 | 2.7934  | -1601.6363 | -1601.5384 | 2.5515 | 2.9917 | -1601.6429 | -1601.5406 |
|        | aug-cc-pvdz | 2.3712 | 2.7548  | -1601.4542 | -1601.3559 | 2.5487 | 2.9476 | -1601.4605 | -1601.3529 |
|        | aug-cc-pvtz | 2.3645 | 2.8102  | -1601.6455 | -1601.5479 | 2.5421 | 3.0027 | -1601.6520 | -1601.5451 |
| M06HF  | cc-pvdz     | 2.3801 | 2.5183  | -1601.5465 | -1601.4419 | 2.6665 | 2.6771 | -1601.5540 | -1601.4430 |
|        | cc-pvtz     | 2.3275 | 2.6965  | -1601.8604 | -1601.7563 | 2.5864 | 2.8386 | -1601.8677 | -1601.7587 |
|        | aug-cc-pvdz | 2.4079 | 3.4276  | -1601.5964 | -1601.4928 | 2.6432 | 3.4653 | -1601.6034 | -1601.4953 |
|        | aug-cc-pvtz | 2.3368 | 3.3632  | -1601.8855 | -1601.7824 | 2.5799 | 3.3801 | -1601.8927 | -1601.7852 |

**Table S7:** The geometry optimization with TDDFT and UDFT for BDBT are singlet and triplet, respectively.  $\Delta E_1$  and  $\Delta E_2$  (in eV) are the energy difference between the first excited triplet states and the second excited triplet states obtained by TDDFT and the ground states. The ground states and excited states energy calculated by UDFT are  $E_s$  and  $E_t$  (in a.u.).

|  | Singlet | Triplet |
|--|---------|---------|
|--|---------|---------|

|           |             | $\Delta E_1$ | $\Delta E_2$ | $E_s$      | $E_t$      | $\Delta E_1$ | $\Delta E_2$ | $E_s$      | $E_t$      |
|-----------|-------------|--------------|--------------|------------|------------|--------------|--------------|------------|------------|
| PBE       | cc-pvdz     | 1.8249       | 2.4254       | -1203.5673 | -1203.4886 | 1.8474       | 2.4524       | -1203.5680 | -1203.4887 |
|           | cc-pvtz     | 1.8512       | 2.3855       | -1203.7864 | -1203.7082 | 1.8718       | 2.4118       | -1203.7872 | -1203.7084 |
|           | aug-cc-pvdz | 1.8571       | 2.3732       | -1203.6090 | -1203.5305 | 1.8767       | 2.3984       | -1203.6096 | -1203.5306 |
|           | aug-cc-pvtz | 1.8592       | 2.3641       | -1203.7960 | -1203.7180 | 1.8787       | 2.3900       | -1203.7968 | -1203.7182 |
| PBE0      | cc-pvdz     | 2.0358       | 2.5421       | -1203.6659 | -1203.5843 | 2.0693       | 2.5884       | -1203.6670 | -1203.5845 |
|           | cc-pvtz     | 2.0653       | 2.5468       | -1203.8702 | -1203.7888 | 2.0975       | 2.5918       | -1203.8713 | -1203.7891 |
|           | aug-cc-pvdz | 2.0940       | 2.5659       | -1203.7004 | -1203.6181 | 2.1243       | 2.6112       | -1203.7014 | -1203.6183 |
|           | aug-cc-pvtz | 2.0824       | 2.5506       | -1203.8776 | -1203.7963 | 2.1135       | 2.5952       | -1203.8787 | -1203.7966 |
| B3LYP     | cc-pvdz     | 2.0799       | 2.5879       | -1204.7428 | -1204.6591 | 2.1083       | 2.6380       | -1204.7437 | -1204.6593 |
|           | cc-pvtz     | 2.1178       | 2.5951       | -1204.9797 | -1204.8959 | 2.1446       | 2.6444       | -1204.9807 | -1204.8961 |
|           | aug-cc-pvdz | 2.1363       | 2.6019       | -1204.7841 | -1204.6999 | 2.1614       | 2.6509       | -1204.7850 | -1204.7000 |
|           | aug-cc-pvtz | 2.1340       | 2.5945       | -1204.9881 | -1204.9043 | 2.1595       | 2.6433       | -1204.9891 | -1204.9045 |
| CAM-B3LYP | cc-pvdz     | 2.1281       | 2.6667       | -1204.2813 | -1204.1954 | 2.1708       | 2.7036       | -1204.2826 | -1204.1956 |
|           | cc-pvtz     | 2.1735       | 2.7006       | -1204.5222 | -1204.4359 | 2.2148       | 2.7359       | -1204.5234 | -1204.4362 |
|           | aug-cc-pvdz | 2.1989       | 2.7113       | -1204.3235 | -1204.2365 | 2.2385       | 2.7463       | -1204.3247 | -1204.2367 |
|           | aug-cc-pvtz | 2.1934       | 2.7090       | -1204.5307 | -1204.4443 | 2.2337       | 2.7434       | -1204.5319 | -1204.4446 |
| WB97XD    | cc-pvdz     | 2.2408       | 2.7427       | -1204.4525 | -1204.3641 | 2.2786       | 2.7858       | -1204.4537 | -1204.3643 |
|           | cc-pvtz     | 2.2707       | 2.7541       | -1204.6632 | -1204.5752 | 2.3080       | 2.7952       | -1204.6644 | -1204.5755 |
|           | aug-cc-pvdz | 2.2996       | 2.7730       | -1204.4862 | -1204.3971 | 2.3350       | 2.8143       | -1204.4873 | -1204.3973 |

|       |             |        |        |            |            |        |        |            |            |
|-------|-------------|--------|--------|------------|------------|--------|--------|------------|------------|
| M062X | aug-cc-pvtz | 2.2873 | 2.7596 | -1204.6711 | -1204.5830 | 2.3238 | 2.7999 | -1204.6724 | -1204.5833 |
|       | cc-pvdz     | 2.2900 | 2.7933 | -1204.4165 | -1204.3263 | 2.3182 | 2.8503 | -1204.4178 | -1204.3264 |
|       | cc-pvtz     | 2.3543 | 2.8091 | -1204.6226 | -1204.5323 | 2.3850 | 2.8601 | -1204.6239 | -1204.5325 |
|       | aug-cc-pvdz | 2.3455 | 2.8098 | -1204.4533 | -1204.3626 | 2.3722 | 2.8641 | -1204.4545 | -1204.3627 |
|       | aug-cc-pvtz | 2.3709 | 2.8126 | -1204.6312 | -1204.5410 | 2.4012 | 2.8622 | -1204.6325 | -1204.5412 |
| M06HF | cc-pvdz     | 2.1109 | 2.8424 | -1204.5497 | -1204.4309 | 2.1232 | 2.9155 | -1204.5512 | -1204.4288 |
|       | cc-pvtz     | 2.2469 | 2.7528 | -1204.8376 | -1204.7177 | 2.2628 | 2.8169 | -1204.8391 | -1204.7190 |
|       | aug-cc-pvdz | 2.2076 | 2.8504 | -1204.5974 | -1204.5045 | 2.2180 | 2.9195 | -1204.5988 | -1204.5047 |
|       | aug-cc-pvtz | 2.2672 | 2.7541 | -1204.8610 | -1204.7699 | 2.2827 | 2.8167 | -1204.8625 | -1204.7701 |

**Table S8:** The geometry optimization with TDDFT and UDFT for FBDBT are singlet and triplet, respectively.  $\Delta E_1$  and  $\Delta E_2$  (in eV) are the energy difference between the first excited triplet states and the second excited triplet states obtained by TDDFT and the ground states. The ground states and excited states energy calculated by UDFT are  $E_s$  and  $E_t$  (in a.u.).

|     |             | Singlet      |              |            |            | Triplet      |              |            |            |
|-----|-------------|--------------|--------------|------------|------------|--------------|--------------|------------|------------|
|     |             | $\Delta E_1$ | $\Delta E_2$ | $E_s$      | $E_t$      | $\Delta E_1$ | $\Delta E_2$ | $E_s$      | $E_t$      |
| PBE | cc-pvdz     | 1.8611       | 2.4468       | -1302.7265 | -1302.6469 | 1.8889       | 2.4773       | -1302.7274 | -1302.6470 |
|     | cc-pvtz     | 1.8855       | 2.4045       | -1302.9789 | -1302.8998 | 1.9115       | 2.4338       | -1302.9799 | -1302.9000 |
|     | aug-cc-pvdz | 1.8921       | 2.3886       | -1302.7779 | -1302.6985 | 1.9171       | 2.4165       | -1302.7787 | -1302.6986 |

|           |             |        |        |            |            |        |        |            |            |
|-----------|-------------|--------|--------|------------|------------|--------|--------|------------|------------|
| PBE0      | aug-cc-pvtz | 1.8954 | 2.3806 | -1302.9909 | -1302.9120 | 1.9203 | 2.4092 | -1302.9919 | -1302.9122 |
|           | cc-pvdz     | 2.0593 | 2.5655 | -1302.8203 | -1302.7376 | 2.0968 | 2.6142 | -1302.8216 | -1302.7378 |
|           | cc-pvtz     | 2.0888 | 2.5718 | -1303.0572 | -1302.9748 | 2.1252 | 2.6191 | -1303.0586 | -1302.9751 |
|           | aug-cc-pvdz | 2.1165 | 2.5893 | -1302.8636 | -1302.7803 | 2.1511 | 2.6364 | -1302.8648 | -1302.7806 |
| B3LYP     | aug-cc-pvtz | 2.1054 | 2.5756 | -1303.0667 | -1302.9842 | 2.1408 | 2.6222 | -1303.0680 | -1302.9845 |
|           | cc-pvdz     | 2.1032 | 2.6037 | -1303.9849 | -1303.9003 | 2.1361 | 2.6554 | -1303.9860 | -1303.9004 |
|           | cc-pvtz     | 2.1408 | 2.6118 | -1304.2553 | -1304.1706 | 2.1723 | 2.6623 | -1304.2564 | -1304.1708 |
|           | aug-cc-pvdz | 2.1587 | 2.6175 | -1304.0353 | -1303.9502 | 2.1886 | 2.6674 | -1304.0364 | -1303.9503 |
| CAM-B3LYP | aug-cc-pvtz | 2.1565 | 2.6113 | -1304.2658 | -1304.1811 | 2.1869 | 2.6610 | -1304.2670 | -1304.1814 |
|           | cc-pvdz     | 2.1438 | 2.6927 | -1303.5060 | -1303.4190 | 2.1899 | 2.7331 | -1303.5074 | -1303.4192 |
|           | cc-pvtz     | 2.1878 | 2.7271 | -1303.7811 | -1303.6937 | 2.2326 | 2.7659 | -1303.7825 | -1303.6941 |
|           | aug-cc-pvdz | 2.2117 | 2.7368 | -1303.5578 | -1303.4698 | 2.2548 | 2.7750 | -1303.5592 | -1303.4701 |
| WB97XD    | aug-cc-pvtz | 2.2065 | 2.7352 | -1303.7918 | -1303.7044 | 2.2503 | 2.7731 | -1303.7933 | -1303.7047 |
|           | cc-pvdz     | 2.2575 | 2.7646 | -1303.6688 | -1303.5794 | 2.2991 | 2.8102 | -1303.6702 | -1303.5796 |
|           | cc-pvtz     | 2.2872 | 2.7778 | -1303.9126 | -1303.8235 | 2.3284 | 2.8214 | -1303.9141 | -1303.8239 |
|           | aug-cc-pvdz | 2.3146 | 2.7951 | -1303.7108 | -1303.6206 | 2.3542 | 2.8385 | -1303.7121 | -1303.6208 |
| M062X     | aug-cc-pvtz | 2.3031 | 2.7833 | -1303.9225 | -1303.8333 | 2.3436 | 2.8260 | -1303.9240 | -1303.8337 |
|           | cc-pvdz     | 2.3106 | 2.8009 | -1303.6341 | -1303.5427 | 2.3436 | 2.8585 | -1303.6354 | -1303.5429 |
|           | cc-pvtz     | 2.3725 | 2.8243 | -1303.8734 | -1303.7820 | 2.4083 | 2.8755 | -1303.8748 | -1303.7822 |
|           | aug-cc-pvdz | 2.3668 | 2.8212 | -1303.6790 | -1303.5871 | 2.3988 | 2.8756 | -1303.6803 | -1303.5872 |

|       |             |        |        |            |            |        |        |            |            |
|-------|-------------|--------|--------|------------|------------|--------|--------|------------|------------|
| M06HF | aug-cc-pvtz | 2.3888 | 2.8290 | -1303.8839 | -1303.7925 | 2.4244 | 2.8787 | -1303.8853 | -1303.7928 |
|       | cc-pvdz     | 2.1352 | 2.8267 | -1303.7666 | -1303.6447 | 2.1506 | 2.9016 | -1303.7683 | -1303.6454 |
|       | cc-pvtz     | 2.2687 | 2.7496 | -1304.0982 | -1303.9791 | 2.2891 | 2.8139 | -1304.0998 | -1303.9783 |
|       | aug-cc-pvdz | 2.2334 | 2.8393 | -1303.8237 | -1303.7299 | 2.2472 | 2.9097 | -1303.8253 | -1303.7301 |
|       | aug-cc-pvtz | 2.2904 | 2.7537 | -1304.1237 | -1304.0316 | 2.3105 | 2.8162 | -1304.1253 | -1304.0318 |

**Table S9:** The geometry optimization with TDDFT and UDFT for ClBDBT are singlet and triplet, respectively.  $\Delta E_1$  and  $\Delta E_2$  (in eV) are the energy difference between the first excited triplet states and the second excited triplet states obtained by TDDFT and the ground states. The ground states and excited states energy calculated by UDFT are  $E_s$  and  $E_t$  (in a.u.).

|      |             | Singlet      |              |            |            | Triplet      |              |            |            |
|------|-------------|--------------|--------------|------------|------------|--------------|--------------|------------|------------|
|      |             | $\Delta E_1$ | $\Delta E_2$ | $E_s$      | $E_t$      | $\Delta E_1$ | $\Delta E_2$ | $E_s$      | $E_t$      |
| PBE  | cc-pvdz     | 1.8114       | 2.3820       | -1662.9933 | -1662.9154 | 1.8300       | 2.4075       | -1662.9940 | -1662.9155 |
|      | cc-pvtz     | 1.8345       | 2.3439       | -1663.2271 | -1663.1496 | 1.8507       | 2.3688       | -1663.2279 | -1663.1498 |
|      | aug-cc-pvdz | 1.8429       | 2.3314       | -1663.0378 | -1662.9600 | 1.8579       | 2.3560       | -1663.0384 | -1662.9601 |
|      | aug-cc-pvtz | 1.8434       | 2.3239       | -1663.2372 | -1663.1599 | 1.8583       | 2.3493       | -1663.2379 | -1663.1601 |
| PBE0 | cc-pvdz     | 2.0210       | 2.5312       | -1663.1252 | -1663.0439 | 2.0551       | 2.5758       | -1663.1262 | -1663.0440 |
|      | cc-pvtz     | 2.0499       | 2.5378       | -1663.3439 | -1663.2629 | 2.0827       | 2.5802       | -1663.3450 | -1663.2632 |
|      | aug-cc-pvdz | 2.0790       | 2.5580       | -1663.1621 | -1663.0802 | 2.1094       | 2.6005       | -1663.1631 | -1663.0804 |
|      | aug-cc-pvtz | 2.0671       | 2.5429       | -1663.3517 | -1663.2707 | 2.0986       | 2.5844       | -1663.3528 | -1663.2710 |

|           |             |        |        |            |            |        |        |            |            |
|-----------|-------------|--------|--------|------------|------------|--------|--------|------------|------------|
| B3LYP     | cc-pvdz     | 2.0645 | 2.5726 | -1664.3604 | -1664.2773 | 2.0925 | 2.6226 | -1664.3613 | -1664.2774 |
|           | cc-pvtz     | 2.1010 | 2.5821 | -1664.6114 | -1664.5282 | 2.1270 | 2.6310 | -1664.6124 | -1664.5284 |
|           | aug-cc-pvdz | 2.1203 | 2.5905 | -1664.4042 | -1664.3204 | 2.1444 | 2.6393 | -1664.4050 | -1664.3206 |
|           | aug-cc-pvtz | 2.1174 | 2.5834 | -1664.6202 | -1664.5369 | 2.1419 | 2.6319 | -1664.6212 | -1664.5372 |
| CAM-B3LYP | cc-pvdz     | 2.1121 | 2.6594 | -1663.9017 | -1663.8160 | 2.1576 | 2.6901 | -1663.9029 | -1663.8162 |
|           | cc-pvtz     | 2.1563 | 2.6939 | -1664.1571 | -1664.0711 | 2.2001 | 2.7194 | -1664.1584 | -1664.0714 |
|           | aug-cc-pvdz | 2.1821 | 2.7055 | -1663.9465 | -1663.8597 | 2.2239 | 2.7295 | -1663.9476 | -1663.8599 |
|           | aug-cc-pvtz | 2.1762 | 2.7028 | -1664.1660 | -1664.0799 | 2.2188 | 2.7254 | -1664.1673 | -1664.0802 |
| WB97XD    | cc-pvdz     | 2.2255 | 2.7322 | -1664.0550 | -1663.9670 | 2.2655 | 2.7709 | -1664.0562 | -1663.9672 |
|           | cc-pvtz     | 2.2552 | 2.7454 | -1664.2802 | -1664.1925 | 2.2947 | 2.7802 | -1664.2815 | -1664.1928 |
|           | aug-cc-pvdz | 2.2840 | 2.7647 | -1664.0910 | -1664.0022 | 2.3214 | 2.7991 | -1664.0922 | -1664.0024 |
|           | aug-cc-pvtz | 2.2718 | 2.7516 | -1664.2886 | -1664.2007 | 2.3105 | 2.7848 | -1664.2898 | -1664.2011 |
| M062X     | cc-pvdz     | 2.2801 | 2.7766 | -1664.0088 | -1663.9187 | 2.3094 | 2.8347 | -1664.0100 | -1663.9188 |
|           | cc-pvtz     | 2.3417 | 2.7975 | -1664.2328 | -1664.1427 | 2.3739 | 2.8478 | -1664.2340 | -1664.1428 |
|           | aug-cc-pvdz | 2.3358 | 2.7969 | -1664.0478 | -1663.9572 | 2.3635 | 2.8514 | -1664.0490 | -1663.9573 |
|           | aug-cc-pvtz | 2.3583 | 2.8025 | -1664.2420 | -1664.1519 | 2.3901 | 2.8511 | -1664.2432 | -1664.1521 |
| M06HF     | cc-pvdz     | 2.1059 | 2.8202 | -1664.1378 | -1664.0183 | 2.1172 | 2.8989 | -1664.1393 | -1664.0463 |
|           | cc-pvtz     | 2.2402 | 2.7337 | -1664.4585 | -1664.3674 | 2.2561 | 2.8010 | -1664.4600 | -1664.3676 |
|           | aug-cc-pvdz | 2.2032 | 2.8307 | -1664.1887 | -1664.0961 | 2.2124 | 2.9044 | -1664.1902 | -1664.0962 |
|           | aug-cc-pvtz | 2.2617 | 2.7369 | -1664.4837 | -1664.3928 | 2.2774 | 2.8021 | -1664.4852 | -1664.3929 |

**Table S10:** The geometry optimization with TDDFT and UDFT for BrBDBT are singlet and triplet, respectively.  $\Delta E_1$  and  $\Delta E_2$  (in eV) are the energy difference between the first excited triplet states and the second excited triplet states obtained by TDDFT and the ground states. The ground states and excited states energy calculated by UDFT are  $E_s$  and  $E_t$  (in a.u.).

|           |             | Singlet      |              |            |            | Triplet      |              |            |            |
|-----------|-------------|--------------|--------------|------------|------------|--------------|--------------|------------|------------|
|           |             | $\Delta E_1$ | $\Delta E_2$ | $E_s$      | $E_t$      | $\Delta E_1$ | $\Delta E_2$ | $E_s$      | $E_t$      |
| PBE       | cc-pvdz     | 1.8058       | 2.3747       | -3776.7176 | -3776.6400 | 1.8249       | 2.4001       | -3776.7183 | -3776.6401 |
|           | cc-pvtz     | 1.8290       | 2.3341       | -3777.0087 | -3776.9315 | 1.8444       | 2.3596       | -3777.0094 | -3776.9317 |
|           | aug-cc-pvdz | 1.8366       | 2.3230       | -3776.7621 | -3776.6846 | 1.8521       | 2.3473       | -3776.7627 | -3776.6847 |
|           | aug-cc-pvtz | 1.8392       | 2.3167       | -3777.0186 | -3776.9416 | 1.8545       | 2.3419       | -3777.0194 | -3776.9418 |
| PBE0      | cc-pvdz     | 2.0157       | 2.5246       | -3776.9005 | -3776.8194 | 2.0506       | 2.5694       | -3776.9016 | -3776.8196 |
|           | cc-pvtz     | 2.0440       | 2.5307       | -3777.1772 | -3777.0965 | 2.0774       | 2.5732       | -3777.1784 | -3777.0968 |
|           | aug-cc-pvdz | 2.0733       | 2.5510       | -3776.9375 | -3776.8558 | 2.1042       | 2.5935       | -3776.9385 | -3776.8560 |
|           | aug-cc-pvtz | 2.0618       | 2.5363       | -3777.1849 | -3777.1041 | 2.0939       | 2.5778       | -3777.1861 | -3777.1044 |
| B3LYP     | cc-pvdz     | 2.0597       | 2.5665       | -3778.2961 | -3778.2132 | 2.0884       | 2.6164       | -3778.2970 | -3778.2133 |
|           | cc-pvtz     | 2.0954       | 2.5754       | -3778.6052 | -3778.5222 | 2.1219       | 2.6243       | -3778.6062 | -3778.5224 |
|           | aug-cc-pvdz | 2.1149       | 2.5841       | -3778.3399 | -3778.2564 | 2.1395       | 2.6327       | -3778.3408 | -3778.2566 |
|           | aug-cc-pvtz | 2.1124       | 2.5775       | -3778.6138 | -3778.5307 | 2.1376       | 2.6258       | -3778.6148 | -3778.5310 |
| CAM-B3LYP | cc-pvdz     | 2.1087       | 2.6541       | -3777.9355 | -3777.8500 | 2.1549       | 2.6855       | -3777.9367 | -3777.8502 |
|           | cc-pvtz     | 2.1525       | 2.6880       | -3778.2490 | -3778.1632 | 2.1970       | 2.7143       | -3778.2503 | -3778.1635 |

|        |             |        |        |            |            |        |        |            |            |
|--------|-------------|--------|--------|------------|------------|--------|--------|------------|------------|
| WB97XD | aug-cc-pvdz | 2.1785 | 2.6997 | -3777.9803 | -3777.8937 | 2.2209 | 2.7244 | -3777.9814 | -3777.8939 |
|        | aug-cc-pvtz | 2.1730 | 2.6974 | -3778.2577 | -3778.1718 | 2.2162 | 2.7208 | -3778.2590 | -3778.1721 |
|        | cc-pvdz     | 2.2217 | 2.7267 | -3778.0387 | -3777.9508 | 2.2625 | 2.7661 | -3778.0399 | -3777.9510 |
|        | cc-pvtz     | 2.2511 | 2.7394 | -3778.3227 | -3778.2352 | 2.2912 | 2.7749 | -3778.3240 | -3778.2355 |
|        | aug-cc-pvdz | 2.2799 | 2.7587 | -3778.0749 | -3777.9862 | 2.3179 | 2.7937 | -3778.0760 | -3777.9865 |
|        | aug-cc-pvtz | 2.2681 | 2.7459 | -3778.3310 | -3778.2433 | 2.3073 | 2.7797 | -3778.3322 | -3778.2436 |
| M062X  | cc-pvdz     | 2.2747 | 2.7709 | -3777.9960 | -3777.9061 | 2.3046 | 2.8299 | -3777.9972 | -3777.9062 |
|        | cc-pvtz     | 2.3368 | 2.7919 | -3778.2662 | -3778.1763 | 2.3697 | 2.8429 | -3778.2675 | -3778.1765 |
|        | aug-cc-pvdz | 2.3303 | 2.7910 | -3778.0355 | -3777.9451 | 2.3585 | 2.8462 | -3778.0367 | -3777.9452 |
|        | aug-cc-pvtz | 2.3538 | 2.7970 | -3778.2753 | -3778.1855 | 2.3862 | 2.8463 | -3778.2766 | -3778.1857 |
| M06HF  | cc-pvdz     | 2.0991 | 2.8177 | -3778.3269 | -3778.2039 | 2.1107 | 2.8979 | -3778.3284 | -3778.2073 |
|        | cc-pvtz     | 2.2354 | 2.7319 | -3778.6720 | -3778.5540 | 2.2515 | 2.8009 | -3778.6735 | -3778.5528 |
|        | aug-cc-pvdz | 2.1964 | 2.8283 | -3778.3785 | -3778.2862 | 2.2058 | 2.9035 | -3778.3800 | -3778.2863 |
|        | aug-cc-pvtz | 2.2572 | 2.7353 | -3778.6970 | -3778.6063 | 2.2730 | 2.8021 | -3778.6985 | -3778.6065 |

**Table S11:** The geometry optimization with TDDFT and UDFT for XA are singlet and triplet, respectively.  $\Delta E_1$  and  $\Delta E_2$  (in eV) are the energy difference between the first excited triplet states and the second excited triplet states obtained by TDDFT and the ground states. The ground states and excited states energy calculated by UDFT are  $E_s$  and  $E_t$  (in a.u.).

|  | Singlet | Triplet |
|--|---------|---------|
|--|---------|---------|



|           |             | $\Delta E_1$ | $\Delta E_2$ | $E_s$     | $E_t$     | $\Delta E_1$ | $\Delta E_2$ | $E_s$     | $E_t$     |
|-----------|-------------|--------------|--------------|-----------|-----------|--------------|--------------|-----------|-----------|
| PBE       | cc-pvdz     | 1.9657       | 2.4873*      | -649.9213 | -649.8013 | 1.9723       | 2.4887*      | -649.9215 | -649.7000 |
|           | cc-pvtz     | 1.9880       | 2.4771*      | -650.0894 | -649.9950 | 1.9940       | 2.4781*      | -650.0895 | -649.9950 |
|           | aug-cc-pvdz | 1.9836       | 2.4791*      | -649.9553 | -649.2310 | 1.9896       | 2.4806*      | -649.9554 | -649.8305 |
|           | aug-cc-pvtz | 1.9876       | 2.4743*      | -650.0973 | -649.8595 | 1.9986       | 2.4757*      | -650.0973 | -650.0031 |
| PBE0      | cc-pvdz     | 2.3801       | 2.4664       | -649.9600 | -649.8665 | 2.3769       | 2.4663       | -649.9598 | -649.8665 |
|           | cc-pvtz     | 2.3975       | 2.4908       | -650.1175 | -650.0251 | 2.3947       | 2.4905       | -650.1172 | -650.0249 |
|           | aug-cc-pvdz | 2.4320       | 2.5045       | -649.9888 | -649.8955 | 2.4300       | 2.5044       | -649.9886 | -649.8953 |
|           | aug-cc-pvtz | 2.4139       | 2.5016       | -650.1238 | -650.0316 | 2.4115       | 2.5012       | -650.1235 | -650.0314 |
| B3LYP     | cc-pvdz     | 2.4312       | 2.4545*      | -650.6943 | -650.5972 | 2.4319       | 2.4528*      | -650.6943 | -650.5973 |
|           | cc-pvtz     | 2.4656       | 2.4805*      | -650.8754 | -650.7786 | 2.4660       | 2.4792*      | -650.8752 | -650.7785 |
|           | aug-cc-pvdz | 2.4715       | 2.4997*      | -650.7280 | -650.6308 | 2.4721       | 2.4990*      | -650.7279 | -650.6307 |
|           | aug-cc-pvtz | 2.4767       | 2.4934*      | -650.8825 | -650.7834 | 2.4771       | 2.4925*      | -650.8823 | -650.7831 |
| CAM-B3LYP | cc-pvdz     | 2.4071       | 2.7283       | -650.3558 | -650.2503 | 2.4035       | 2.7242       | -650.3557 | -650.2502 |
|           | cc-pvtz     | 2.4547       | 2.7760       | -650.5400 | -650.4344 | 2.4519       | 2.7717       | -650.5397 | -650.4341 |
|           | aug-cc-pvdz | 2.4824       | 2.7854       | -650.3904 | -650.2846 | 2.4803       | 2.7815       | -650.3902 | -650.2843 |
|           | aug-cc-pvtz | 2.4764       | 2.7903       | -650.5472 | -650.4415 | 2.4740       | 2.7860       | -650.5468 | -650.4412 |
| WB97XD    | cc-pvdz     | 2.5382       | 2.7565       | -650.4739 | -650.3657 | 2.5354       | 2.7530       | -650.4737 | -650.3655 |
|           | cc-pvtz     | 2.5568       | 2.7862       | -650.6366 | -650.5289 | 2.5546       | 2.7826       | -650.6363 | -650.5286 |
|           | aug-cc-pvdz | 2.5897       | 2.8023       | -650.5017 | -650.3935 | 2.5881       | 2.7989       | -650.5015 | -650.3932 |

|       |             |        |         |           |           |        |         |           |           |
|-------|-------------|--------|---------|-----------|-----------|--------|---------|-----------|-----------|
| M062X | aug-cc-pvtz | 2.5718 | 2.7977  | -650.6432 | -650.5355 | 2.5699 | 2.7941  | -650.6429 | -650.5352 |
|       | cc-pvdz     | 2.5987 | 2.6981  | -650.4607 | -650.3504 | 2.5952 | 2.6919  | -650.4606 | -650.3502 |
|       | cc-pvtz     | 2.6143 | 2.7918  | -650.6174 | -650.5184 | 2.6112 | 2.7856  | -650.6172 | -650.5182 |
|       | aug-cc-pvdz | 2.6311 | 2.7504  | -650.4905 | -650.3913 | 2.6290 | 2.7445  | -650.4903 | -650.3912 |
|       | aug-cc-pvtz | 2.6257 | 2.8100  | -650.6242 | -650.5256 | 2.6230 | 2.8037  | -650.6239 | -650.5255 |
| M06HF | cc-pvdz     | 2.5058 | 2.6206* | -650.5541 | -650.4383 | 2.4936 | 2.6152* | -650.5539 | -650.4382 |
|       | cc-pvtz     | 2.5757 | 2.6767  | -650.7653 | -650.6488 | 2.5702 | 2.6648  | -650.7650 | -650.6486 |
|       | aug-cc-pvdz | 2.6610 | 3.8384  | -650.5925 | -650.4760 | 2.6036 | 2.6579* | -650.5923 | -650.4757 |
|       | aug-cc-pvtz | 2.5914 | 3.8096  | -650.7823 | -650.6660 | 2.5865 | 2.6932  | -650.7820 | -650.6658 |

**Table S12:** The geometry optimization with TDDFT and UDFT for AR are singlet and triplet, respectively.  $\Delta E_1$  and  $\Delta E_2$  (in eV) are the energy difference between the first excited triplet states and the second excited triplet states obtained by TDDFT and the ground states. The ground states and excited states energy calculated by UDFT are  $E_s$  and  $E_t$  (in a.u.).

|     |             | Singlet      |              |           |           | Triplet      |              |           |           |
|-----|-------------|--------------|--------------|-----------|-----------|--------------|--------------|-----------|-----------|
|     |             | $\Delta E_1$ | $\Delta E_2$ | $E_s$     | $E_t$     | $\Delta E_1$ | $\Delta E_2$ | $E_s$     | $E_t$     |
| PBE | cc-pvdz     | 2.0977       | 2.2270*      | -630.0823 | -629.9137 | 1.9189       | 2.1920*      | -630.0773 | -629.9287 |
|     | cc-pvtz     | 2.1163       | 2.2074*      | -630.2435 | -630.0655 | 1.9397       | 2.1799*      | -630.2388 | -630.0908 |
|     | aug-cc-pvdz | 2.1111       | 2.2012*      | -630.1162 | -629.9114 | 1.9363       | 2.1788*      | -630.1114 | -629.9551 |
|     | aug-cc-pvtz | 2.1197       | 2.2000*      | -630.2515 | -630.0604 | 1.9453       | 2.1769*      | -630.2469 | -630.0837 |

|           |             |        |        |           |           |        |        |           |           |
|-----------|-------------|--------|--------|-----------|-----------|--------|--------|-----------|-----------|
| PBE0      | cc-pvdz     | 2.2913 | 2.6618 | -630.1273 | -630.0366 | 2.1862 | 2.4651 | -630.1220 | -630.0286 |
|           | cc-pvtz     | 2.2882 | 2.6834 | -630.2773 | -630.1875 | 2.2010 | 2.4917 | -630.2723 | -630.1799 |
|           | aug-cc-pvdz | 2.2968 | 2.6964 | -630.1555 | -630.0658 | 2.2247 | 2.5086 | -630.1505 | -630.0571 |
|           | aug-cc-pvtz | 2.2900 | 2.6929 | -630.2837 | -630.1942 | 2.2141 | 2.5050 | -630.2788 | -630.1866 |
| B3LYP     | cc-pvdz     | 2.3106 | 2.6114 | -630.8444 | -630.7542 | 2.2253 | 2.4174 | -630.8393 | -630.7424 |
|           | cc-pvtz     | 2.3106 | 2.6432 | -631.0189 | -630.9293 | 2.2428 | 2.4531 | -631.0141 | -630.9262 |
|           | aug-cc-pvdz | 2.3103 | 2.6483 | -630.8783 | -630.7891 | 2.2543 | 2.4622 | -630.8735 | -630.7856 |
|           | aug-cc-pvtz | 2.3093 | 2.6530 | -631.0260 | -630.9368 | 2.2516 | 2.4668 | -631.0214 | -630.9336 |
| CAM-B3LYP | cc-pvdz     | 2.3756 | 2.9432 | -630.5029 | -630.4053 | 2.2505 | 2.7456 | -630.4978 | -630.4029 |
|           | cc-pvtz     | 2.3929 | 2.9876 | -630.6803 | -630.5834 | 2.2920 | 2.7956 | -630.6756 | -630.5809 |
|           | aug-cc-pvdz | 2.3997 | 2.9959 | -630.5375 | -630.4410 | 2.3140 | 2.8092 | -630.5328 | -630.4382 |
|           | aug-cc-pvtz | 2.3987 | 2.9998 | -630.6875 | -630.5910 | 2.3111 | 2.8128 | -630.6829 | -630.5884 |
| WB97XD    | cc-pvdz     | 2.4558 | 2.9704 | -630.6318 | -630.5321 | 2.3468 | 2.7712 | -630.6266 | -630.5294 |
|           | cc-pvtz     | 2.4547 | 2.9970 | -630.7869 | -630.6881 | 2.3639 | 2.8039 | -630.7820 | -630.6854 |
|           | aug-cc-pvdz | 2.4633 | 3.0122 | -630.6594 | -630.5608 | 2.3864 | 2.8231 | -630.6544 | -630.5577 |
|           | aug-cc-pvtz | 2.4567 | 3.0068 | -630.7935 | -630.6951 | 2.3764 | 2.8181 | -630.7887 | -630.6923 |
| M062X     | cc-pvdz     | 2.4435 | 2.9220 | -630.6139 | -630.5131 | 2.3306 | 2.7285 | -630.6084 | -630.5101 |
|           | cc-pvtz     | 2.4511 | 3.0113 | -630.7634 | -630.6631 | 2.3562 | 2.8246 | -630.7583 | -630.6601 |
|           | aug-cc-pvdz | 2.4380 | 2.9709 | -630.6438 | -630.5445 | 2.3551 | 2.7886 | -630.6386 | -630.5411 |
|           | aug-cc-pvtz | 2.4509 | 3.0279 | -630.7704 | -630.6707 | 2.3666 | 2.8464 | -630.7654 | -630.6672 |

|       |             |        |        |           |           |        |        |           |           |
|-------|-------------|--------|--------|-----------|-----------|--------|--------|-----------|-----------|
| M06HF | cc-pvdz     | 2.4449 | 2.7767 | -630.7105 | -630.6015 | 2.2973 | 2.6168 | -630.7047 | -630.6000 |
|       | cc-pvtz     | 2.4314 | 2.9415 | -630.9146 | -630.8062 | 2.3035 | 2.7951 | -630.9095 | -630.8040 |
|       | aug-cc-pvdz | 2.4453 | 2.8844 | -630.7497 | -630.6421 | 2.3425 | 3.6765 | -630.7443 | -630.6394 |
|       | aug-cc-pvtz | 2.4362 | 3.6954 | -630.9322 | -630.8247 | 2.3215 | 3.6173 | -630.9271 | -630.8221 |

**Table S13:** The geometry optimization with TDDFT and UDFT for AD are singlet and triplet, respectively.  $\Delta E_1$  and  $\Delta E_2$  (in eV) are the energy difference between the first excited triplet states and the second excited triplet states obtained by TDDFT and the ground states. The ground states and excited states energy calculated by UDFT are  $E_s$  and  $E_t$  (in a.u.).

|       |             | Singlet      |              |           |           | Triplet      |              |           |           |
|-------|-------------|--------------|--------------|-----------|-----------|--------------|--------------|-----------|-----------|
|       |             | $\Delta E_1$ | $\Delta E_2$ | $E_s$     | $E_t$     | $\Delta E_1$ | $\Delta E_2$ | $E_s$     | $E_t$     |
| PBE   | cc-pvdz     | 1.8982       | 2.1355*      | -972.7888 | -972.6461 | 2.1524       | 2.2542*      | -972.7958 | -972.6418 |
|       | cc-pvtz     | 1.9086       | 2.1142*      | -972.9504 | -972.8097 | 2.1568       | 2.2202*      | -972.9575 | -972.7947 |
|       | aug-cc-pvdz | 1.9010       | 2.1165*      | -972.8206 | -972.6729 | 2.1483       | 2.2139*      | -972.8272 | -972.6133 |
|       | aug-cc-pvtz | 1.9034       | 2.1061*      | -972.9576 | -972.8114 | 2.1508       | 2.2046*      | -972.9646 | -972.7986 |
| PBE0  | cc-pvdz     | 2.0385       | 2.3643       | -972.8600 | -972.7745 | 2.2991       | 2.6334       | -972.8689 | -972.7763 |
|       | cc-pvtz     | 2.0557       | 2.3855       | -973.0112 | -972.9264 | 2.2913       | 2.6468       | -973.0201 | -972.9288 |
|       | aug-cc-pvdz | 2.0907       | 2.4004       | -972.8867 | -972.8015 | 2.3071       | 2.6560       | -972.8951 | -972.8037 |
|       | aug-cc-pvtz | 2.0704       | 2.3952       | -973.0169 | -972.9323 | 2.2909       | 2.6511       | -973.0257 | -972.9349 |
| B3LYP | cc-pvdz     | 2.1099       | 2.3264       | -973.6697 | -973.5839 | 2.3350       | 2.5955       | -973.6776 | -973.5853 |

|           |             |        |        |           |           |        |        |           |           |
|-----------|-------------|--------|--------|-----------|-----------|--------|--------|-----------|-----------|
| CAM-B3LYP | cc-pvtz     | 2.1273 | 2.3555 | -973.8437 | -973.7585 | 2.3255 | 2.6183 | -973.8517 | -973.7606 |
|           | aug-cc-pvdz | 2.1476 | 2.3619 | -973.7012 | -973.6158 | 2.3297 | 2.6186 | -973.7087 | -973.6177 |
|           | aug-cc-pvtz | 2.1361 | 2.3649 | -973.8501 | -973.7652 | 2.3194 | 2.6222 | -973.8580 | -973.7674 |
|           | cc-pvdz     | 2.0552 | 2.6083 | -973.3433 | -973.2521 | 2.3487 | 2.8717 | -973.3523 | -973.2530 |
|           | cc-pvtz     | 2.1030 | 2.6518 | -973.5204 | -973.4296 | 2.3654 | 2.9065 | -973.5294 | -973.4314 |
|           | aug-cc-pvdz | 2.1361 | 2.6633 | -973.3756 | -973.2845 | 2.3809 | 2.9100 | -973.3841 | -973.2862 |
| WB97XD    | aug-cc-pvtz | 2.1253 | 2.6657 | -973.5268 | -973.4363 | 2.3710 | 2.9132 | -973.5357 | -973.4384 |
|           | cc-pvdz     | 2.1783 | 2.6353 | -973.4538 | -973.3600 | 2.4540 | 2.8998 | -973.4629 | -973.3613 |
|           | cc-pvtz     | 2.1999 | 2.6627 | -973.6090 | -973.5160 | 2.4512 | 2.9183 | -973.6182 | -973.5181 |
|           | aug-cc-pvdz | 2.2342 | 2.6801 | -973.4796 | -973.3861 | 2.4685 | 2.9292 | -973.4883 | -973.3881 |
| M062X     | aug-cc-pvtz | 2.2151 | 2.6743 | -973.6150 | -973.5221 | 2.4526 | 2.9236 | -973.6241 | -973.5245 |
|           | cc-pvdz     | 2.2079 | 2.5807 | -973.4251 | -973.3302 | 2.5014 | 2.8360 | -973.4347 | -973.3320 |
|           | cc-pvtz     | 2.2273 | 2.6740 | -973.5789 | -973.4843 | 2.4913 | 2.9191 | -973.5883 | -973.4869 |
|           | aug-cc-pvdz | 2.2455 | 2.6374 | -973.4531 | -973.3587 | 2.4943 | 2.8756 | -973.4622 | -973.3611 |
| M06HF     | aug-cc-pvtz | 2.2385 | 2.6939 | -973.5854 | -973.4911 | 2.4868 | 2.9318 | -973.5947 | -973.4940 |
|           | cc-pvdz     | 2.1825 | 2.4182 | -973.5119 | -973.4131 | 2.5626 | 2.6119 | -973.5226 | -973.4142 |
|           | cc-pvtz     | 2.1452 | 2.6033 | -973.7291 | -973.6297 | 2.4872 | 2.7765 | -973.7394 | -973.6323 |
|           | aug-cc-pvdz | 2.2384 | 3.6148 | -973.5485 | -973.4495 | 2.5511 | 3.7475 | -973.5586 | -973.4522 |
|           | aug-cc-pvtz | 2.1610 | 3.5809 | -973.7464 | -973.6477 | 2.4829 | 3.7016 | -973.7566 | -973.6509 |

**Table S14:** The energy differences  $\Delta E$  (in eV) relative to experimental values for the phosphorescence energy of AQs (except for BDBT, FBDBT, BrBDBT) calculated by TD//TDDFT with different functionals (PBE, PBE0, B3LYP, CAM-B3LYP,  $\omega$ B97XD, M062X, M06HF) at the cc-pVTZ level.

|        | Expt. | CC2   | PBE    | PBE0  | B3LYP | CAM-B3LYP | $\omega$ B97XD | M062X | M06HF  |
|--------|-------|-------|--------|-------|-------|-----------|----------------|-------|--------|
| HA     | 2.53  | 0.01  | -0.86* | -0.79 | -0.73 | -0.67     | -0.56          | -0.40 | -0.23* |
| AAT    | 1.94  | 0.09  | -0.69  | -0.59 | -0.57 | -0.44     | -0.37          | -0.24 | 0.01   |
| BP     | 2.58  | -0.12 | -0.74  | -0.51 | -0.46 | -0.40     | -0.30          | -0.23 | -0.36  |
| TX-BT  | 2.43  | 0.89  | 0.27   | 0.23  | 0.33  | 0.19      | 0.35           | 0.73  | 0.95   |
| TX-DBT | 2.34  | 0.48  | -0.25* | -0.17 | -0.13 | 0.37      | -0.01          | 0.02  | -0.01  |
| BDBT   | 2.18  | 0.32  | -0.32  | -0.11 | -0.06 | 0.00      | 0.10           | 0.18  | 0.07   |
| FBDBT  | 2.18  | 0.34  | -0.29  | -0.09 | -0.03 | 0.01      | 0.11           | 0.20  | 0.09   |
| CIBDBT | 2.64  | -0.15 | -0.80  | -0.59 | -0.54 | -0.48     | -0.38          | -0.30 | -0.40  |
| BrBDBT | 2.18  | 0.30  | -0.35  | -0.13 | -0.08 | -0.01     | 0.08           | 0.16  | 0.03   |
| XA     | 3.10  | 0.06  | -0.62* | -0.70 | -0.62 | -0.65     | -0.54          | -0.49 | -0.52  |
| AR     | 2.36  | 0.50  | -0.15* | -0.07 | -0.05 | 0.03      | 0.09           | 0.09  | 0.07   |
| AD     | 2.73  | 0.06  | -0.62* | -0.68 | -0.60 | -0.63     | -0.53          | -0.50 | -0.59  |
| MUE    | -     | 0.23  | 0.50   | 0.39  | 0.35  | 0.32      | 0.29           | 0.29  | 0.28   |

**Table S15:** The energy differences  $\Delta E$  (in eV) relative to experimental values for the phosphorescence energy of AQs (except for BDBT, FBDBT, BrBDBT) calculated by TD//UDFT with different functionals (PBE, PBE0, B3LYP, CAM-B3LYP,  $\omega$ B97XD, M062X, M06HF) at the cc-pVTZ level.

|        | PBE  | PBE0 | B3LYP | CAM-B3LYP | $\omega$ B97XD | M062X | M06HF |
|--------|------|------|-------|-----------|----------------|-------|-------|
| HA     | 1.18 | 0.52 | 0.46  | 0.35      | 0.30           | 0.21  | 0.08  |
| AAT    | 0.32 | 0.33 | 0.29  | 0.26      | 0.22           | 0.15  | 0.09  |
| BP     | 0.34 | 0.39 | 0.30  | 0.27      | 0.22           | 0.16  | 0.14  |
| TX-BT  | 0.44 | 0.63 | 0.62  | 0.78      | 0.85           | 1.01  | 1.35  |
| TX-DBT | 0.12 | 0.03 | 0.03  | 0.26      | 0.30           | 0.32  | 0.49  |
| BDBT   | 0.05 | 0.04 | 0.10  | 0.17      | 0.22           | 0.28  | 1.09  |

|        |      |      |      |      |      |      |      |
|--------|------|------|------|------|------|------|------|
| FBDBT  | 0.02 | 0.07 | 0.13 | 0.20 | 0.25 | 0.31 | 1.06 |
| CIBDBT | 0.53 | 0.43 | 0.37 | 0.30 | 0.25 | 0.19 | 0.16 |
| BrBDBT | 0.08 | 0.02 | 0.08 | 0.16 | 0.21 | 0.27 | 1.04 |
| XA     | 0.53 | 0.58 | 0.47 | 0.23 | 0.17 | 0.40 | 0.07 |
| AR     | 2.48 | 0.08 | 0.07 | 0.27 | 0.33 | 0.37 | 0.59 |
| AD     | 1.09 | 0.43 | 0.41 | 0.26 | 0.20 | 0.16 | 0.03 |
| MUE    | 0.60 | 0.30 | 0.28 | 0.29 | 0.29 | 0.32 | 0.52 |

**Table S16:** The energy differences  $\Delta E$  (in eV) relative to experimental values for the phosphorescence energy of AQs (except for BDBT, FBDBT, BrBDBT) calculated by U//UDFT with different functionals (PBE, PBE0, B3LYP, CAM-B3LYP,  $\omega$ B97XD, M062X, M06HF) at the cc-pVTZ level.

|        | CC2   | PBE   | PBE0  | B3LYP | CAM-B3LYP | $\omega$ B97XD | M062X | M06HF |
|--------|-------|-------|-------|-------|-----------|----------------|-------|-------|
| HA     | 0.01  | 1.48  | -0.47 | -0.46 | -0.35     | -0.30          | -0.21 | -0.08 |
| AAT    | 0.09  | -0.31 | -0.32 | -0.28 | -0.25     | -0.21          | -0.14 | -0.08 |
| BP     | -0.08 | -0.32 | -0.36 | -0.27 | -0.24     | -0.19          | -0.13 | -0.10 |
| TX-BT  | 0.24  | -0.11 | -0.10 | -0.08 | -0.06     | 0.01           | 0.18  | 0.38  |
| TX-DBT | 0.57  | -0.05 | 0.15  | 0.13  | 0.36      | 0.42           | 0.45  | 0.62  |
| BDBT   | 0.34  | -0.03 | 0.06  | 0.13  | 0.20      | 0.25           | 0.31  | 1.09  |
| FBDBT  | 0.39  | 0.00  | 0.10  | 0.15  | 0.23      | 0.28           | 0.35  | 1.13  |
| CIBDBT | -0.12 | -0.52 | -0.41 | -0.35 | -0.27     | -0.23          | -0.16 | -0.12 |
| BrBDBT | 0.33  | -0.06 | 0.04  | 0.10  | 0.19      | 0.23           | 0.30  | 1.11  |
| XA     | 0.06  | -0.53 | -0.59 | -0.47 | -0.22     | -0.17          | -0.41 | 0.07  |
| AR     | 0.47  | 1.66  | 0.15  | 0.03  | 0.21      | 0.27           | 0.31  | 0.51  |
| AD     | 0.20  | 1.70  | -0.25 | -0.25 | -0.07     | -0.01          | 0.03  | 0.18  |
| MUE    | 0.21  | 0.56  | 0.25  | 0.23  | 0.22      | 0.21           | 0.25  | 0.46  |

**Table S17:** The energy differences  $\Delta E$  (in eV) relative to experimental values for the phosphorescence energy of AQs (except for BDBT, FBDBT, BrBDBT) calculated by TD//UDFT with different functionals (PBE, PBE0, B3LYP, CAM-B3LYP,  $\omega$ B97XD, M062X, M06HF) at the cc-pVTZ level.

| PBE | PBE0 | B3LYP | CAM- | $\omega$ B97XD | M062X | M06HF |
|-----|------|-------|------|----------------|-------|-------|
|-----|------|-------|------|----------------|-------|-------|

|        | B3LYP  |       |        |       |       |       |        |
|--------|--------|-------|--------|-------|-------|-------|--------|
| HA     | -0.86* | -0.78 | -0.73  | -0.66 | -0.56 | -0.40 | -0.23* |
| AAT    | -0.66  | -0.58 | -0.55  | -0.44 | -0.36 | -0.24 | -0.02  |
| BP     | -0.71  | -0.47 | -0.42  | -0.35 | -0.26 | -0.20 | -0.35  |
| TX-BT  | -0.25  | -0.47 | -0.35  | -0.59 | -0.44 | -0.03 | 0.10   |
| TX-DBT | -0.20  | -0.01 | -0.01  | 0.09  | 0.18  | 0.21  | 0.25   |
| BDBT   | -0.30  | -0.08 | -0.03  | 0.04  | 0.13  | 0.21  | 0.09   |
| FBDBT  | -0.26  | -0.05 | 0.00   | 0.06  | 0.15  | 0.23  | 0.11   |
| ClBDBT | -0.79  | -0.56 | -0.51  | -0.44 | -0.34 | -0.26 | -0.38  |
| BrBDBT | -0.33  | -0.10 | -0.05  | 0.02  | 0.12  | 0.19  | 0.08   |
| XA     | -0.62* | -0.71 | -0.62* | -0.65 | -0.55 | -0.49 | -0.53  |
| AR     | -0.18* | -0.16 | -0.12  | -0.07 | 0.00  | -0.01 | -0.06  |
| AD     | -0.51* | -0.44 | -0.41  | -0.37 | -0.28 | -0.24 | -0.24  |
| MUE    | 0.47   | 0.37  | 0.32   | 0.31  | 0.28  | 0.23  | 0.20   |

**Table S18:** The energy differences  $\Delta E$  (in eV) relative to CC2 for the phosphorescence energy of AQs calculated by U//TDDFT with different functionals (PBE, PBE0, B3LYP, CAM-B3LYP,  $\omega$ B97XD, M062X, M06HF) at the cc-pVTZ level.

|        | PBE   | PBE0  | B3LYP | CAM-B3LYP | $\omega$ B97XD | M062X | M06HF |
|--------|-------|-------|-------|-----------|----------------|-------|-------|
| HA     | 1.17  | -0.53 | -0.47 | -0.36     | -0.31          | -0.23 | -0.09 |
| AAT    | -0.40 | -0.42 | -0.38 | -0.35     | -0.31          | -0.24 | -0.18 |
| BP     | -0.23 | -0.27 | -0.18 | -0.15     | -0.11          | -0.05 | -0.03 |
| TX-BT  | -0.45 | -0.27 | -0.27 | -0.11     | -0.05          | 0.11  | 0.46  |
| TX-DBT | -0.60 | -0.45 | -0.46 | -0.22     | -0.18          | -0.16 | 0.01  |
| BDBT   | -0.36 | -0.28 | -0.21 | -0.14     | -0.10          | -0.04 | 0.77  |
| FBDBT  | -0.37 | -0.28 | -0.21 | -0.14     | -0.09          | -0.03 | 0.72  |
| ClBDBT | -0.38 | -0.29 | -0.23 | -0.15     | -0.10          | -0.04 | -0.01 |
| BrBDBT | -0.38 | -0.28 | -0.22 | -0.15     | -0.10          | -0.03 | 0.73  |
| XA     | -0.59 | -0.64 | -0.52 | -0.28     | -0.23          | -0.46 | 0.01  |
| AR     | 1.98  | -0.42 | -0.42 | -0.22     | -0.17          | -0.13 | 0.09  |
| AD     | 1.03  | -0.49 | -0.47 | -0.32     | -0.26          | -0.22 | -0.09 |



|                    |      |      |      |      |      |      |      |
|--------------------|------|------|------|------|------|------|------|
| MUE <sup>(a)</sup> | 0.66 | 0.38 | 0.34 | 0.22 | 0.17 | 0.14 | 0.27 |
|--------------------|------|------|------|------|------|------|------|

**Table S19:** The energy differences  $\Delta E$  (in eV) relative to CC2 for the phosphorescence energy of AQs calculated by TD//TDDFT with different functionals (PBE, PBE0, B3LYP, CAM-B3LYP,  $\omega$ B97XD, M062X, M06HF) at the cc-pVTZ level.

|                    | PBE    | PBE0  | B3LYP  | CAM-B3LYP | $\omega$ B97XD | M062X | M06HF  |
|--------------------|--------|-------|--------|-----------|----------------|-------|--------|
| HA                 | -0.87* | -0.80 | -0.75  | -0.68     | -0.57          | -0.41 | -0.24* |
| AAT                | -0.81  | -0.72 | -0.70  | -0.56     | -0.49          | -0.36 | -0.11  |
| BP                 | -0.62  | -0.40 | -0.34  | -0.28     | -0.19          | -0.12 | -0.25  |
| TX-BT              | -0.62  | -0.67 | -0.56  | -0.70     | -0.55          | -0.16 | 0.06   |
| TX-DBT             | -0.73  | -0.65 | -0.61  | -0.11     | -0.49          | -0.46 | -0.49  |
| BDBT               | -0.64  | -0.43 | -0.37  | -0.32     | -0.22          | -0.14 | -0.25  |
| FBDBT              | -0.63  | -0.43 | -0.38  | -0.33     | -0.23          | -0.15 | -0.25  |
| ClBDBT             | -0.66  | -0.44 | -0.39  | -0.33     | -0.23          | -0.15 | -0.25  |
| BrBDBT             | -0.65  | -0.44 | -0.38  | -0.33     | -0.23          | -0.14 | -0.24  |
| XA                 | -0.68* | -0.76 | -0.68* | -0.70     | -0.60          | -0.54 | -0.58  |
| AR                 | -0.65* | -0.57 | -0.55  | -0.47     | -0.40          | -0.41 | -0.43  |
| AD                 | -0.68* | -0.74 | -0.66  | -0.69     | -0.59          | -0.56 | -0.65  |
| MUE <sup>(a)</sup> | 0.69   | 0.59  | 0.53   | 0.46      | 0.40           | 0.30  | 0.32   |

**Table S20:** The energy differences  $\Delta E$  (in eV) relative to CC2 for the phosphorescence energy of AQs (except for BDBT, FBDBT, BrBDBT) calculated by U//UDFT with different functionals (PBE, PBE0, B3LYP, CAM-B3LYP,  $\omega$ B97XD, M062X, M06HF) at the cc-pVTZ level.

|                | HA    | AAT   | BP    | TX-BT | TX-DBT | ClBDBT | XA    | AR    | AD    | MUE <sup>(a)</sup> |
|----------------|-------|-------|-------|-------|--------|--------|-------|-------|-------|--------------------|
| PBE            | 1.47  | -0.40 | -0.24 | -0.35 | -0.62  | -0.39  | -0.59 | 1.19  | 1.50  | 0.75               |
| PBE0           | -0.49 | -0.41 | -0.28 | -0.34 | -0.42  | -0.29  | -0.65 | -0.32 | -0.45 | 0.41               |
| B3LYP          | -0.47 | -0.38 | -0.18 | -0.32 | -0.44  | -0.23  | -0.53 | -0.44 | -0.45 | 0.38               |
| CAM-B3LYP      | -0.36 | -0.34 | -0.15 | -0.30 | -0.21  | -0.15  | -0.28 | -0.26 | -0.27 | 0.26               |
| $\omega$ B97XD | -0.31 | -0.30 | -0.11 | -0.23 | -0.14  | -0.10  | -0.23 | -0.2  | -0.20 | 0.20               |

|       |       |       |       |       |       |       |       |       |       |      |
|-------|-------|-------|-------|-------|-------|-------|-------|-------|-------|------|
| M062X | -0.23 | -0.24 | -0.05 | -0.07 | -0.12 | -0.03 | -0.47 | -0.16 | -0.17 | 0.17 |
| M06HF | -0.09 | -0.17 | -0.02 | 0.14  | 0.06  | 0.00  | 0.01  | 0.04  | -0.02 | 0.06 |

**Table S21:** In M06HF functional the BDBT, FBDBT, ClBDBT and BrBDBT, the phosphorescence energy calculated by cc-pVDZ, cc-pVTZ, aug-cc-pVDZ, aug-cc-pVTZ and CC2.

|        | cc-pVDZ | cc-pVTZ | aug-cc-pVDZ | aug-cc-pVTZ | CC2  |
|--------|---------|---------|-------------|-------------|------|
| BDBT   | 3.33    | 3.27    | 2.56        | 2.51        | 2.52 |
| FBDBT  | 3.34    | 3.31    | 2.59        | 2.54        | 2.56 |
| ClBDBT | 2.53    | 2.52    | 2.56        | 2.51        | 2.52 |
| BrBDBT | 3.29    | 3.29    | 2.55        | 2.50        | 2.51 |

**Table S22:** The  $S^2$  values for the triplet states of AQs calculated by UDFT with different functionals (PBE, PBE0, B3LYP, CAM-B3LYP,  $\omega$ B97XD, M062X, M06HF) at the cc-pVTZ level.

|                    | PBE  | PBE0 | B3LYP | CAM-B3LYP | $\omega$ B97XD | M062X | M06HF |
|--------------------|------|------|-------|-----------|----------------|-------|-------|
| HA                 | 2.01 | 2.03 | 2.02  | 2.05      | 2.04           | 2.05  | 2.09  |
| AAT                | 2.01 | 2.03 | 2.02  | 2.05      | 2.04           | 2.04  | 2.08  |
| BP                 | 2.01 | 2.04 | 2.02  | 2.05      | 2.04           | 2.02  | 2.03  |
| TX-BT              | 2.01 | 2.03 | 2.02  | 2.04      | 2.03           | 2.02  | 2.03  |
| TX-DBT             | 2.00 | 2.02 | 2.01  | 2.02      | 2.02           | 2.02  | 2.03  |
| BDBT               | 2.01 | 2.03 | 2.02  | 2.05      | 2.05           | 2.03  | 2.04  |
| FBDBT              | 2.01 | 2.03 | 2.02  | 2.06      | 2.05           | 2.03  | 2.04  |
| ClBDBT             | 2.01 | 2.04 | 2.02  | 2.06      | 2.05           | 2.03  | 2.03  |
| BrBDBT             | 2.01 | 2.03 | 2.02  | 2.06      | 2.05           | 2.03  | 2.04  |
| XA                 | 2.00 | 2.04 | 2.02  | 2.03      | 2.03           | 2.03  | 2.04  |
| AR                 | 2.00 | 2.03 | 2.01  | 2.02      | 2.02           | 2.02  | 2.03  |
| AD                 | 2.00 | 2.01 | 2.01  | 2.02      | 2.02           | 2.02  | 2.03  |
| AVE <sup>(a)</sup> | 2.01 | 2.03 | 2.02  | 2.04      | 2.04           | 2.03  | 2.04  |

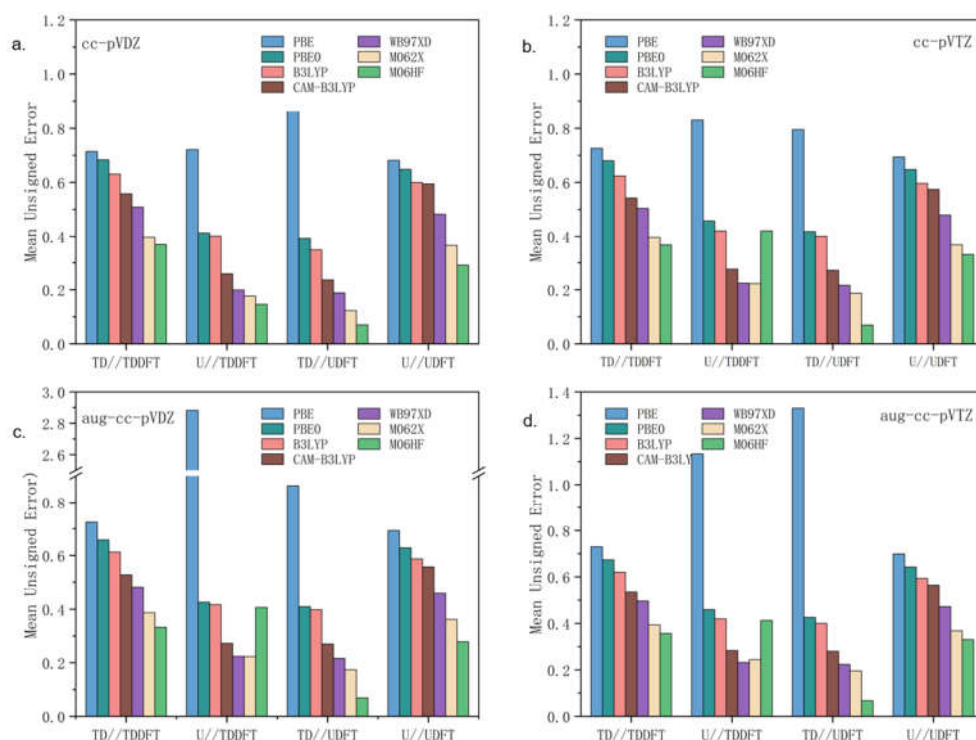

Figure S1: The MUE values (excluding BDBT, FBDBT, ClBDBT, BrBDBT) obtained by different basis sets under the same phosphorescence energy calculation method and functionals. (a), (b), (c), and (d) represent the results obtained with the basis set of cc-pVDZ, cc-pVTZ, aug-cc-pVDZ, and aug-cc-pVTZ, respectively.
